# Supplementary material for: Modification of Barley Plant Productivity Through Regulation of Cytokinin Content by Reverse-Genetics Approaches
Source: Front Plant Sci. 2018 Nov 27;9:1676. doi: 10.3389/fpls.2018.01676 (PMC6277847; doi:10.3389/fpls.2018.01676)
Supplement: Supplementary file 8 [file Table_8.xlsx]

## Sheet: KD-CKX1_17.10
List of differentially expressed genes in the spike of the silenced CKX1 line SC1-17.10 (compared to wild-type/WT) at stage 49.
Positive values reflect genes which were up-regulated in the transgenic line compared to the WT whereas negative values reflect genes which were down-regulated in the transgenic line compared to the WT.
Functional annotation was obtained from Mercator/Mapman
The expression of genes marked in yellow color was validated by qRT-PCR
MLOC_ID	Description	BIN_number	BIN_description	log2FoldChange	padj		total DEGs	37		25
MLOC_54756	Replication protein A 32 kDa subunitIPR014892 (Replication protein A, C-terminal), IPR016027 (Nucleic acid-binding, OB-fold-like)	35.2	not assigned.unknown	8.5	2,84E-34		Bin category	up		down
MLOC_26429	Transposon protein, putative, ping/pong/SNOOPY sub-class	35.2	not assigned.unknown	7.5	1,31E-61			#	%	#	%
MLOC_53680	HAT dimerisation domain-containing protein-likeIPR008906 (HAT dimerisation), IPR012337 (Ribonuclease H-like domain)	35.2	not assigned.unknown	7.5	2,85E-42		PS	0	0	1	0.04
MLOC_8115	3-ketoacyl-CoA synthaseIPR012392 (Very-long-chain 3-ketoacyl-CoA synthase), IPR016039 (Thiolase-like)	16.7	secondary metabolism.wax	6.7	2,26E-25		Glycolysis	0	0	1	0.04
MLOC_20041	Lipid transfer proteinIPR016140 (Bifunctional inhibitor/plant lipid transfer protein/seed storage helical domain)	35.2	not assigned.unknown	6.4	2,59E-12		Mitochondrial electron transport / ATP synthesis	0	0	1	0.04
MLOC_60700	Replication protein A 70 kDa DNA-binding subunitIPR016027 (Nucleic acid-binding, OB-fold-like)	28.99	DNA.unspecified	6.2	1,10E-11		Lipid metabolism	1	0.027027	0	0
MLOC_58639	Cytokinin oxidase/dehydrogenase 1IPR016164 (FAD-linked oxidase-like, C-terminal), IPR016166 (FAD-binding, type 2)	17.4.1	hormone metabolism.cytokinin.synthesis-degradation	5.6	6,90E-19		Secondary metabolism	1	0.027027	0	0
MLOC_57202	Retrotransposon protein, putative, unclassified	35.2	not assigned.unknown	4.8	1,91E-08		Hormone metabolism	2	0.0540541	0	0
MLOC_27199	Unknown protein	35.2	not assigned.unknown	4.2	4,55E-05		Stress	0	0	1	0.04
MLOC_40202	MLOC_40202	35.2	not assigned.unknown	4.2	4,59E-05		Polyamine metabolism	1	0.027027	0	0
MLOC_58866	Arginine decarboxylaseIPR000183 (Ornithine/DAP/Arg decarboxylase)	22.1.3	polyamine metabolism.synthesis.arginine decarboxylase	4.1	0,003817013		Misc.	1	0.027027	1	0.04
MLOC_34881	MLOC_34881	35.2	not assigned.unknown	4.0	0,000965418		RNA	2	0.0540541	1	0.04
MLOC_44678	12-oxophytodienoate reductase 2IPR013785 (Aldolase-type TIM barrel)	17.7.1.5	hormone metabolism.jasmonate.synthesis-degradation.12-Oxo-PDA-reductase	3.7	2,88E-07		DNA	3	0.0810811		0
MLOC_9548	Retrotransposon protein, putative, unclassifiedIPR000477 (Reverse transcriptase)	35.2	not assigned.unknown	3.6	0,000101589		Protein	1	0.027027	1	0.04
MLOC_17138	receptor-like protein kinase-related family protein LENGTH=263IPR002902 (Gnk2-homologous domain)	35.2	not assigned.unknown	3.6	6,44E-09		Transport	0	0	1	0.04
MLOC_13942	Cytochrome P450, putativeIPR001128 (Cytochrome P450)	26.10	misc.cytochrome P450	3.3	1,53E-05		Not assigned	25	0.675676	17	0.68
MLOC_36262	MLOC_36262	35.2	not assigned.unknown	3.0	3,69E-05
MLOC_68332	Retrotransposon protein, putative, unclassifiedIPR000477 (Reverse transcriptase)	35.2	not assigned.unknown	3.0	0,000306831
MLOC_21661	Wound induced protein homolog	35.2	not assigned.unknown	2.9	0,001394656
MLOC_56299	Retrotransposon protein, putative, unclassifiedIPR000477 (Reverse transcriptase)	35.2	not assigned.unknown	2.7	0,00019007
MLOC_43997	F-box-like proteinIPR001810 (F-box domain, cyclin-like), IPR011044 (Quinoprotein amine dehydrogenase, beta chain-like)	35.2	not assigned.unknown	2.7	4,69E-05
MLOC_56741	Retrotransposon protein, putative, LINE subclass, expressedIPR005135 (Endonuclease/exonuclease/phosphatase)	35.2	not assigned.unknown	2.6	0,00057192
MLOC_13365	Kinase-like proteinIPR001480 (Bulb-type lectin domain), IPR011009 (Protein kinase-like domain), IPR013320 (Concanavalin A-like lectin/glucanase, subgroup)	29.4	protein.postranslational modification	2.5	0,000965175
MLOC_57491	Retrotransposon protein, putative, unclassified	35.2	not assigned.unknown	2.4	6,44E-09
MLOC_69209	Plant protein of unknown function (DUF247) LENGTH=509IPR004158 (Protein of unknown function DUF247, plant)	35.2	not assigned.unknown	2.4	0,003281238
MLOC_60586	GrpE protein homolog	35.2	not assigned.unknown	2.3	1,83E-07
MLOC_56298	Retrotransposon protein, putative, unclassified	35.2	not assigned.unknown	2.0	2,49E-05
MLOC_53891	Unknown protein	35.2	not assigned.unknown	1.7	0,000232874
MLOC_240	NAM-like protein	35.2	not assigned.unknown	1.7	0,000794098
MLOC_64735	basic helix-loop-helix (bHLH) DNA-binding superfamily protein LENGTH=328IPR011598 (Helix-loop-helix DNA-binding)	27.3.6	RNA.regulation of transcription.bHLH transcription factor family	1.7	0,000578696
MLOC_25093	Unknown protein	35.2	not assigned.unknown	1.6	4,71E-06
MLOC_38801	Gibberellin receptor GID1L2IPR013094 (Alpha/beta hydrolase fold-3)	11.9.3.2	lipid metabolism.lipid degradation.lysophospholipases.carboxylesterase	1.6	1,53E-05
MLOC_15798	Unknown protein	35.2	not assigned.unknown	1.4	0,001855662
MLOC_52732	FAR1-related proteinIPR004330 (FAR1 DNA binding domain)	27.3.111	RNA.regulation of transcription.FAR1 transcription factor family	1.4	0,003024882
MLOC_26807	unknown protein Has 54 Blast hits to 54 proteins in 22 species: Archae - 0 Bacteria - 0 Metazoa - 29 Fungi - 0 Plants - 24 Viruses - 0 Other Eukaryotes - 1 (source: NCBI BLink). LENGTH=642	35.2	not assigned.unknown	1.4	1,05E-27
MLOC_69650	ATP-dependent DNA helicase MPH1IPR014001 (Helicase, superfamily 1/2, ATP-binding domain)	28.1	DNA.synthesis/chromatin structure	1.2	0,000504037
MLOC_64780	Unknown proteinIPR011676 (Domain of unknown function DUF1618)	35.2	not assigned.unknown	1.1	2,86E-05
MLOC_13987	ATP-dependent DNA helicase mph1IPR001650 (Helicase, C-terminal)	28.1	DNA.synthesis/chromatin structure	1.1	1,88E-18
MLOC_19463	Cell division cycle protein, putativeIPR009772 (D123)	20.2	stress.abiotic	-0.4	0,006863909
MLOC_51081	Pentatricopeptide repeat-containing proteinIPR002885 (Pentatricopeptide repeat), IPR011990 (Tetratricopeptide-like helical)	35.1.5	not assigned.no ontology.pentatricopeptide (PPR) repeat-containing protein	-0.6	0,000980004
MLOC_70958	Conserved hypothetical membrane proteinIPR019275 (Protein of unknown function DUF2301)	9.7	mitochondrial electron transport / ATP synthesis.cytochrome c oxidase	-0.9	0,000965175
MLOC_66229	Unknown proteinIPR011676 (Domain of unknown function DUF1618)	35.2	not assigned.unknown	-1.0	0,00581484
MLOC_38579	Poly(RC)-binding protein, putativeIPR004088 (K Homology domain, type 1)	27.3.99	RNA.regulation of transcription.unclassified	-1.2	4,59E-05
MLOC_56052	Chlorophyll a-b binding protein 2IPR022796 (Chlorophyll A-B binding protein), IPR023329 (Chlorophyll a/b binding protein domain)	1.1.1.1	PS.lightreaction.photosystem II.LHC-II	-1.4	0,006476589
MLOC_67381	Phosphoenolpyruvate carboxylase, putativeIPR021135 (Phosphoenolpyruvate carboxylase)	4.1.15	glycolysis.cytosolic branch.phospho-enol-pyruvate carboxylase (PEPC)	-2.2	2,88E-07
MLOC_62171	Purine permeaseIPR000620 (Drug/metabolite transporter), IPR004853 (Domain of unknown function DUF250)	34.10	transport.nucleotides	-2.7	0,004242525
MLOC_60542	MLOC_60542	26.3	misc.gluco-, galacto- and mannosidases	-3.1	0,004979206
MLOC_74627	Cysteine proteinaseIPR013128 (Peptidase C1A, papain)	29.5.3	protein.degradation.cysteine protease	-3.4	0,000151165
MLOC_30710	HAT dimerisation domain-containing protein-likeIPR003656 (Zinc finger, BED-type predicted)	35.2	not assigned.unknown	-3.8	0,004643996
MLOC_12283	PLANT CADMIUM RESISTANCE 2 LENGTH=152IPR006461 (Uncharacterised protein family Cys-rich)	35.1	not assigned.no ontology	-5.3	6,70E-12
MLOC_27023	HAT family dimerization domain containing protein	35.2	not assigned.unknown	-5.7	1,85E-11
MLOC_27949	Unknown protein	35.2	not assigned.unknown	-5.8	1,48E-14
MLOC_40205	Transposon protein, putative, CACTA, En/Spm sub-class	35.2	not assigned.unknown	-6.1	8,04E-17
MLOC_48096	Transposon protein, putative, CACTA, En/Spm sub-class	35.2	not assigned.unknown	-6.1	3,63E-13
MLOC_26287	Transposon protein, putative, CACTA, En/Spm sub-class	35.2	not assigned.unknown	-6.6	1,49E-18
MLOC_31095	Transposon protein, putative, CACTA, En/Spm sub-class	35.2	not assigned.unknown	-6.9	3,60E-21
MLOC_490	Unknown protein	35.2	not assigned.unknown	-7.1	4,24E-26
MLOC_52761	Transposon protein, putative, CACTA, En/Spm sub-class	35.2	not assigned.unknown	-7.3	3,03E-26
MLOC_49609	ATP synthase subunit-like protein	35.2	not assigned.unknown	-7.7	7,47E-31
MLOC_46817	Transposon protein, putative, CACTA, En/Spm sub-classIPR004242 (Transposon, En/Spm-like)	35.2	not assigned.unknown	-7.7	6,77E-30
MLOC_47391	ATP synthase subunit-like proteinIPR004252 (Transposase, Ptta/En/Spm, plant)	35.2	not assigned.unknown	-8.3	6,62E-62
MLOC_52240	ATP synthase subunit-like protein	35.2	not assigned.unknown	-8.6	4,53E-44
MLOC_312	MAR-binding protein, putative, expressed	35.2	not assigned.unknown	-9.8	5,76E-95

## Sheet: KD-CKX1_5.8
List of differentially expressed genes in the spike of the silenced CKX1 line SC1-5.8 (compared to wild-type/WT) at stage 49.
Positive values reflect genes which were up-regulated in the transgenic line compared to the WT whereas negative values reflect genes which were down-regulated in the transgenic line compared to the WT.
Functional annotation was obtained from Mercator/Mapman
The expression of genes marked in yellow color was validated by qRT-PCR
MLOC_ID	Description	BIN_number	BIN_description	log2FoldChange	padj		total DEGs		104		66
MLOC_72448	Unknown protein	35.2	not assigned.unknown	9.0	0,003169495		Bin category		up		down
MLOC_26681	Calcium binding EGF domain containing protein, expressed	35.2	not assigned.unknown	9.0	0,00260101				#	%	#	%
MLOC_36506	Plant protein of unknown function (DUF247) LENGTH=509IPR004158 (Protein of unknown function DUF247, plant)	35.2	not assigned.unknown	8.5	9,74E-05		PS	1	0	0	1	0.0151515
MLOC_33063	Bifunctional inhibitor/lipid-transfer protein/seed storage 2S albumin superfamily protein LENGTH=110IPR016140 (Bifunctional inhibitor/plant lipid transfer protein/seed storage helical domain)	35.2	not assigned.unknown	8.3	0,001176539		Secondary metabolism	16	0	0	1	0.0151515
MLOC_46377	Calcium binding EGF domain containing protein, expressed	35.2	not assigned.unknown	8.2	0,002358133		Hormone metabolism	17	4	0.0384615	2	0.030303
MLOC_52434	Calcium binding EGF domain containing protein, expressed	35.2	not assigned.unknown	7.8	8,89E-05		Stress	20	4	0.0384615	10	0.151515
MLOC_13301	Heavy metal-associated domain containing protein, expressedIPR006121 (Heavy metal-associated domain, HMA)	35.2	not assigned.unknown	7.7	0,002926379		Biodegradation of xenobiotic	24	1	0.00961538	0	0
MLOC_7281	Protein of unknown function (DUF594) LENGTH=803IPR007658 (Protein of unknown function DUF594)	35.2	not assigned.unknown	7.4	0,004576917		C1 metabolism	25	1	0.00961538	0	0
MLOC_60700	Replication protein A 70 kDa DNA-binding subunitIPR016027 (Nucleic acid-binding, OB-fold-like)	28.99	DNA.unspecified	6.4	6,73E-13		Misc.	26	1	0.00961538	4	0.0606061
MLOC_56298	Retrotransposon protein, putative, unclassified	35.2	not assigned.unknown	6.3	3,94E-05		RNA	27	7	0.0673077	5	0.0757576
MLOC_46369	MLOC_46369	35.2	not assigned.unknown	5.7	0,002764432		DNA	28	5	0.0480769	1	0.0151515
MLOC_58639	Cytokinin oxidase/dehydrogenase 1IPR016164 (FAD-linked oxidase-like, C-terminal), IPR016166 (FAD-binding, type 2)	17.4.1	hormone metabolism.cytokinin.synthesis-degradation	5.6	3,74E-19		Protein	29	5	0.0480769	7	0.106061
MLOC_55014	MLOC_55014	34.2	transport.sugars	5.6	1,64E-13		Signaling	30	0	0	8	0.121212
MLOC_23906	MLOC_23906	27.3.111	RNA.regulation of transcription.FAR1 transcription factor family	5.6	0,001189615		Cell	31	1	0.00961538	1	0.0151515
MLOC_35341	Transposon protein, putative, Pong sub-classIPR006912 (Putative harbinger transposase-derived nuclease)	29.2.1.99.99	protein.synthesis.ribosomal protein.unknown.unknown	5.5	1,14E-09		Development	33	1	0.00961538	0	0
MLOC_7702	Receptor-like serine-threonine protein kinaseIPR002902 (Gnk2-homologous domain)	35.2	not assigned.unknown	5.4	3,84E-12		Transport	34	2	0.0192308	0	0
MLOC_66991	F-box domain containing proteinIPR001810 (F-box domain, cyclin-like)	35.2	not assigned.unknown	5.4	0,005179507		Not assigned	35	71	0.682692	27	0.409091
MLOC_70421	Protein of unknown function (DUF567) LENGTH=196IPR000007 (Tubby, C-terminal), IPR000649 (Initiation factor 2B-related), IPR007612 (LURP1-like domain)	35.2	not assigned.unknown	5.2	1,75E-05
MLOC_45211	TTF-type zinc finger protein with HAT dimerisation domain LENGTH=769IPR008906 (HAT dimerisation), IPR012337 (Ribonuclease H-like domain)	28.1.1.4	DNA.synthesis/chromatin structure.retrotransposon/transposase.hat-like transposase	5.2	3,20E-12
MLOC_60586	GrpE protein homolog	35.2	not assigned.unknown	5.1	0,001716788
MLOC_74100	F-box domain containing protein, expressed	35.2	not assigned.unknown	5.0	0,005201675
MLOC_71615	Protein kinase family proteinIPR011009 (Protein kinase-like domain)	29.4.1.59	protein.postranslational modification.kinase.receptor like cytoplasmatic kinase IX	4.9	1,82E-11
MLOC_74173	NBS-LRR class disease resistance protein	35.2	not assigned.unknown	4.8	7,70E-06
MLOC_56689	Unknown proteinIPR022059 (Protein of unknown function DUF3615)	35.2	not assigned.unknown	4.7	5,23E-11
MLOC_36388	F-box domain containing protein	35.2	not assigned.unknown	4.7	0,001024454
MLOC_71487	PAIR1 protein, putative, expressed	35.2	not assigned.unknown	4.5	0,001350703
MLOC_12203	F-box domain containing proteinIPR005174 (Protein of unknown function DUF295)	35.2	not assigned.unknown	4.4	0,006709162
MLOC_53531	unknown protein Has 75 Blast hits to 52 proteins in 16 species: Archae - 0 Bacteria - 0 Metazoa - 4 Fungi - 2 Plants - 66 Viruses - 0 Other Eukaryotes - 3 (source: NCBI BLink). LENGTH=481IPR005380 (XS domain)	35.2	not assigned.unknown	4.4	1,52E-11
MLOC_37473	MLOC_37473	35.1	not assigned.no ontology	4.3	0,004172847
MLOC_58351	MLOC_58351	35.2	not assigned.unknown	4.2	0,000372312
MLOC_64735	basic helix-loop-helix (bHLH) DNA-binding superfamily protein LENGTH=328IPR011598 (Helix-loop-helix DNA-binding)	27.3.111	RNA.regulation of transcription.FAR1 transcription factor family	4.0	1,22E-09
MLOC_43355	Ribosomal RNA apurinic site specific lyase	35.2	not assigned.unknown	4.0	0,007893396
MLOC_65245	UDP-Glycosyltransferase superfamily protein LENGTH=489IPR002213 (UDP-glucuronosyl/UDP-glucosyltransferase)	17.4.1	hormone metabolism.cytokinin.synthesis-degradation	3.9	0,000618702
MLOC_66229	Unknown proteinIPR011676 (Domain of unknown function DUF1618)	35.2	not assigned.unknown	3.8	0,001176539
MLOC_58770	Cytochrome P450 family protein, expressedIPR001128 (Cytochrome P450)	26.10	misc.cytochrome P450	3.7	0,002613733
MLOC_56951	FBD-associated F-box protein LENGTH=459IPR001810 (F-box domain, cyclin-like)	29.5.11.4.3.2	protein.degradation.ubiquitin.E3.SCF.FBOX	3.6	0,002695713
MLOC_5839	RNA recognition motif-containing proteinIPR012677 (Nucleotide-binding, alpha-beta plait)	35.2	not assigned.unknown	3.6	1,03E-15
MLOC_11485	NB-ARC domain-containing disease resistance protein LENGTH=926IPR001229 (Mannose-binding lectin), IPR002182 (NB-ARC)	20.1	stress.biotic	3.5	0,003169495
MLOC_44678	12-oxophytodienoate reductase 2IPR013785 (Aldolase-type TIM barrel)	17.7.1.5	hormone metabolism.jasmonate.synthesis-degradation.12-Oxo-PDA-reductase	3.4	2,91E-06
MLOC_41053	Transposon protein, putative, Mutator sub-classIPR019557 (Aminotransferase-like, plant mobile domain)	35.2	not assigned.unknown	3.4	1,10E-05
MLOC_26807	unknown protein Has 54 Blast hits to 54 proteins in 22 species: Archae - 0 Bacteria - 0 Metazoa - 29 Fungi - 0 Plants - 24 Viruses - 0 Other Eukaryotes - 1 (source: NCBI BLink). LENGTH=642	35.2	not assigned.unknown	3.3	3,06E-24
MLOC_38270	BTB/POZ domain containing proteinIPR008974 (TRAF-like), IPR011333 (BTB/POZ fold)	29.5.11.4.5.2	protein.degradation.ubiquitin.E3.BTB/POZ Cullin3.BTB/POZ	3.3	5,11E-12
MLOC_29828	ATP synthase subunit-like proteinIPR004252 (Transposase, Ptta/En/Spm, plant), IPR017690 (Outer membrane insertion C-terminal signal, omp85 target)	35.2	not assigned.unknown	3.3	6,34E-08
MLOC_36712	NBS-LRR resistance-like protein	35.2	not assigned.unknown	3.3	0,001306574
MLOC_15115	unknown protein FUNCTIONS IN: molecular_function unknown INVOLVED IN: biological_process unknown LOCATED IN: endomembrane system BEST Arabidopsis thaliana protein match is: unknown protein . LENGTH=569IPR008946 (Nuclear hormone receptor, ligand-binding)	35.2	not assigned.unknown	3.2	0,00068704
MLOC_53891	Unknown protein	35.2	not assigned.unknown	3.2	1,64E-05
MLOC_68931	DefensinIPR008176 (Gamma thionin)	35.2	not assigned.unknown	3.2	0,006289823
MLOC_75995	NBS-LRR resistance-like proteinIPR001611 (Leucine-rich repeat)	35.2	not assigned.unknown	3.2	0,006160396
MLOC_16741	NBS-LRR resistance-like protein	35.2	not assigned.unknown	3.2	0,008546812
MLOC_57491	Retrotransposon protein, putative, unclassified	35.2	not assigned.unknown	3.1	5,03E-08
MLOC_74542	NBS-LRR disease resistance protein, putative, expressedIPR000767 (Disease resistance protein)	20.1	stress.biotic	3.1	3,57E-24
MLOC_109	Retrotransposon protein, putative, unclassifiedIPR005162 (Retrotransposon gag protein), IPR021109 (Peptidase aspartic)	35.2	not assigned.unknown	3.0	4,18E-06
MLOC_56741	Retrotransposon protein, putative, LINE subclass, expressedIPR005135 (Endonuclease/exonuclease/phosphatase)	35.2	not assigned.unknown	3.0	0,001943618
MLOC_29762	Transposon protein, putative, CACTA, En/Spm sub-class	35.2	not assigned.unknown	3.0	0,000122741
MLOC_7414	Polynucleotidyl transferase, ribonuclease H-like proteinIPR012337 (Ribonuclease H-like domain)	28.99	DNA.unspecified	3.0	0,005436618
MLOC_75504	DNA repair helicase rad5,16, putativeIPR000330 (SNF2-related)	27.3.111	RNA.regulation of transcription.FAR1 transcription factor family	2.9	0,000676924
MLOC_3019	Late embryogenesis abundant (LEA) hydroxyproline-rich glycoprotein family LENGTH=213IPR004864 (Late embryogenesis abundant protein, LEA-14)	35.2	not assigned.unknown	2.8	0,000585087
MLOC_18441	Homeodomain transcription factorIPR009057 (Homeodomain-like), IPR013083 (Zinc finger, RING/FYVE/PHD-type)	27.3.110	RNA.regulation of transcription.TIFY transcription factor family	2.8	6,04E-06
MLOC_18163	Ulp1 protease family, C-terminal catalytic domain containing protein, expressedIPR003653 (Peptidase C48, SUMO/Sentrin/Ubl1)	35.2	not assigned.unknown	2.7	2,32E-08
MLOC_1504	Transposon protein, putative, CACTA, En/Spm sub-class, expressed	35.2	not assigned.unknown	2.6	1,70E-29
MLOC_73245	Unknown protein	35.2	not assigned.unknown	2.6	0,004092293
MLOC_68332	Retrotransposon protein, putative, unclassifiedIPR000477 (Reverse transcriptase)	35.2	not assigned.unknown	2.6	0,003169495
MLOC_81494	Unknown protein	35.2	not assigned.unknown	2.6	0,003169495
MLOC_23132	Retrotransposon protein, putative, unclassified	35.2	not assigned.unknown	2.6	0,007893396
MLOC_25093	Unknown protein	35.2	not assigned.unknown	2.5	5,40E-21
MLOC_31683	Retrotransposon protein, putative, unclassified	35.2	not assigned.unknown	2.5	1,08E-05
MLOC_9957	Germin-like protein 2aIPR001929 (Germin), IPR011051 (Cupin, RmlC-type)	20.2.99	stress.abiotic.unspecified	2.4	0,006766423
MLOC_240	NAM-like protein	35.2	not assigned.unknown	2.4	6,76E-15
MLOC_64708	NBS-LRR disease resistance protein, putativeIPR000767 (Disease resistance protein), IPR015300 (DNA-binding pseudobarrel domain)	27.3.6	RNA.regulation of transcription.bHLH transcription factor family	2.4	1,08E-05
MLOC_11323	Transposon protein, putative, CACTA, En/Spm sub-class, expressed	35.2	not assigned.unknown	2.4	2,11E-38
MLOC_18772	BURP domain containing proteinIPR004873 (BURP domain)	35.2	not assigned.unknown	2.3	0,000993531
MLOC_36262	MLOC_36262	35.2	not assigned.unknown	2.3	5,02E-06
MLOC_55083	Glyoxalase/bleomycin resistance protein/dioxygenaseIPR004360 (Glyoxalase/fosfomycin resistance/dioxygenase)	24.2	Biodegradation of Xenobiotics.lactoylglutathione lyase	2.3	0,005080415
MLOC_284	Sugar transporter, putativeIPR005828 (General substrate transporter), IPR016196 (Major facilitator superfamily domain, general substrate transporter)	34.2	transport.sugars	2.3	2,18E-05
MLOC_29243	Unknown protein	35.2	not assigned.unknown	2.2	0,000773295
MLOC_2407	Transposon protein, putative, CACTA, En/Spm sub-class, expressed	35.2	not assigned.unknown	2.2	6,82E-08
MLOC_47258	Retrotransposon protein, putative, unclassified	35.2	not assigned.unknown	2.1	1,56E-05
EPlHVUG00000000405	EPlHVUG00000000405			1.9	0,003659411
MLOC_61480	Beta-1,3-N-Acetylglucosaminyltransferase family protein	35.2	not assigned.unknown	1.9	0,007640373
MLOC_9548	Retrotransposon protein, putative, unclassifiedIPR000477 (Reverse transcriptase)	35.2	not assigned.unknown	1.8	0,000913341
MLOC_53442	FAR1-related sequence 7 LENGTH=764IPR004330 (FAR1 DNA binding domain), IPR007527 (Zinc finger, SWIM-type), IPR018289 (MULE transposase domain)	27.1.2	RNA.processing.RNA helicase	1.8	7,59E-06
MLOC_27941	Unknown proteinIPR012474 (Frigida-like)	35.2	not assigned.unknown	1.7	1,23E-38
MLOC_75896	CAA303711.1 protein	35.2	not assigned.unknown	1.6	0,003169495
MLOC_883	Leucine-rich repeat receptor-like kinaseIPR001611 (Leucine-rich repeat), IPR013210 (Leucine-rich repeat-containing N-terminal, type 2)	20.1	stress.biotic	1.6	0,00745976
MLOC_26887	Transposon protein, putative, CACTA, En/Spm sub-class, expressed	35.2	not assigned.unknown	1.3	9,99E-17
MLOC_17138	receptor-like protein kinase-related family protein LENGTH=263IPR002902 (Gnk2-homologous domain)	35.2	not assigned.unknown	1.3	6,42E-08
MLOC_43526	1-aminocyclopropane-1-carboxylate oxidaseIPR005123 (Oxoglutarate/iron-dependent oxygenase)	17.5.1.2	hormone metabolism.ethylene.synthesis-degradation.1-aminocyclopropane-1-carboxylate oxidase	1.2	0,003073485
MLOC_27876	Glutathione transferase-like protein	35.1	not assigned.no ontology	1.2	0,009898944
MLOC_76996	Far-red impaired response-likeIPR004330 (FAR1 DNA binding domain)	35.2	not assigned.unknown	1.1	0,003169495
MLOC_79993	Unknown proteinIPR008176 (Gamma thionin)	35.1	not assigned.no ontology	1.1	0,000604582
MLOC_28610	UDP-sugar pyrophosphorylase LENGTH=614	35.2	not assigned.unknown	1.0	0,004201292
MLOC_69330	Retrotransposon protein, putative, Ty1-copia subclass	35.2	not assigned.unknown	1.0	0,000604582
MLOC_77116	HGWP repeat containing protein-like	35.2	not assigned.unknown	1.0	9,53E-07
MLOC_749	Retrotransposon protein, putative, unclassified	35.2	not assigned.unknown	1.0	0,001200785
MLOC_60771	Ankyrin repeat family protein-likeIPR020683 (Ankyrin repeat-containing domain)	31.1	cell.organisation	0.9	5,75E-08
MLOC_57202	Retrotransposon protein, putative, unclassified	35.1	not assigned.no ontology	0.7	3,79E-08
MLOC_22377	50S ribosomal protein L11IPR000911 (Ribosomal protein L11)	29.2.1.1.1.2.11	protein.synthesis.ribosomal protein.prokaryotic.chloroplast.50S subunit.L11	0.7	0,008939684
MLOC_30349	Unknown protein	35.2	not assigned.unknown	0.6	0,000585087
MLOC_76334	DNA mismatch repair protein mutSIPR000305 (Excinuclease ABC, C subunit, N-terminal), IPR000432 (DNA mismatch repair protein MutS, C-terminal)	28.2	DNA.repair	0.6	0,002764432
MLOC_65637	FolD bifunctional proteinIPR000672 (Tetrahydrofolate dehydrogenase/cyclohydrolase)	25.5	C1-metabolism.Methylenetetrahydrofolate dehydrogenase & Methenyltetrahydrofolate cyclohydrolase	0.6	0,002358133
MLOC_74600	FAR1-related sequence 5 LENGTH=788IPR004330 (FAR1 DNA binding domain), IPR007527 (Zinc finger, SWIM-type), IPR018289 (MULE transposase domain)	27.3.67	RNA.regulation of transcription.putative transcription regulator	0.4	0,003664753
MLOC_60174	Ornithine decarboxylaseIPR000183 (Ornithine/DAP/Arg decarboxylase)	35.1	not assigned.no ontology	0.4	0,000205827
MLOC_60279	DNA-damage-repair/toleration protein DRT102IPR003500 (Ribose/galactose isomerase), IPR012100 (DNA-damage-repair/toleration protein, DRT102)	28.2	DNA.repair	0.4	0,004323307
MLOC_60578	WD repeat proteinIPR015943 (WD40/YVTN repeat-like-containing domain)	33.99	development.unspecified	0.3	0,002613733
MLOC_5547	DNA ligaseIPR000977 (DNA ligase, ATP-dependent), IPR001357 (BRCT domain), IPR016027 (Nucleic acid-binding, OB-fold-like)	28.1	DNA.synthesis/chromatin structure	-0.3	0,000104416
MLOC_19463	Cell division cycle protein, putativeIPR009772 (D123)	20.2	stress.abiotic	-0.4	0,000928694
MLOC_20041	Lipid transfer proteinIPR016140 (Bifunctional inhibitor/plant lipid transfer protein/seed storage helical domain)	35.2	not assigned.unknown	-0.5	2,74E-07
MLOC_9466	FAR1-related sequence 5 LENGTH=788	27.3.111	RNA.regulation of transcription.FAR1 transcription factor family	-0.5	0,002764432
MLOC_16831	UDP-Glycosyltransferase superfamily protein LENGTH=456IPR002213 (UDP-glucuronosyl/UDP-glucosyltransferase)	17.2.1	hormone metabolism.auxin.synthesis-degradation	-0.5	0,001191246
MLOC_79984	FAR1-related sequence 5 LENGTH=788IPR004330 (FAR1 DNA binding domain), IPR018289 (MULE transposase domain)	27.3.119	RNA.regulation of transcription.B3 RAV transcription factor family	-0.6	1,09E-05
MLOC_51081	Pentatricopeptide repeat-containing proteinIPR002885 (Pentatricopeptide repeat), IPR011990 (Tetratricopeptide-like helical)	35.1.5	not assigned.no ontology.pentatricopeptide (PPR) repeat-containing protein	-0.6	0,004930995
MLOC_72616	Disease resistance proteinIPR000767 (Disease resistance protein), IPR001611 (Leucine-rich repeat)	20.1.7	stress.biotic.PR-proteins	-0.6	0,007893396
MLOC_1588	FAR1-related sequence 5 LENGTH=788IPR018289 (MULE transposase domain)	27.3.111	RNA.regulation of transcription.FAR1 transcription factor family	-0.7	1,87E-07
MLOC_38445	NBS-LRR disease resistance protein homologueIPR000767 (Disease resistance protein)	20.1	stress.biotic	-0.7	8,62E-06
MLOC_80344	GRF zinc finger family protein	35.2	not assigned.unknown	-0.7	5,54E-07
MLOC_54856	Pentatricopeptide repeat-containing protein, putativeIPR002885 (Pentatricopeptide repeat), IPR011990 (Tetratricopeptide-like helical)	35.1.5	not assigned.no ontology.pentatricopeptide (PPR) repeat-containing protein	-0.8	0,006103466
MLOC_72099	ATP-dependent zinc metalloprotease FtsH 1IPR003959 (ATPase, AAA-type, core), IPR005936 (Peptidase, FtsH)	29.5.7	protein.degradation.metalloprotease	-0.8	0,000453263
MLOC_76583	Kinase, putativeIPR008985 (Concanavalin A-like lectin/glucanase), IPR011009 (Protein kinase-like domain)	30.2.19	signalling.receptor kinases.legume-lectin	-0.9	0,009050063
MLOC_24563	Transposon protein, putative, CACTA, En/Spm sub-class	35.2	not assigned.unknown	-0.9	3,58E-08
MLOC_45755	ZIM motif family proteinIPR010399 (Tify), IPR018467 (CO/COL/TOC1, conserved site)	27.3.44	RNA.regulation of transcription.Chromatin Remodeling Factors	-1.0	0,006339775
MLOC_73797	NBS-LRR disease resistance protein, putativeIPR000767 (Disease resistance protein), IPR008700 (Pathogenic type III effector avirulence factor Avr cleavage site)	20.1	stress.biotic	-1.1	6,54E-07
MLOC_73463	Protein kinaseIPR002902 (Gnk2-homologous domain), IPR011009 (Protein kinase-like domain)	29.4	protein.postranslational modification	-1.2	0,000458
MLOC_18260	Receptor-like kinaseIPR011009 (Protein kinase-like domain)	30.2.11	signalling.receptor kinases.leucine rich repeat XI	-1.2	0,004329741
MLOC_68464	Unknown protein	35.2	not assigned.unknown	-1.3	9,69E-12
MLOC_21385	Receptor-like kinaseIPR011009 (Protein kinase-like domain)	29.4	protein.postranslational modification	-1.4	0,006436484
MLOC_33151	Sugar transporter ERD6-like 5	35.2	not assigned.unknown	-1.4	7,25E-12
MLOC_81998	HGWP repeat containing protein-like	35.2	not assigned.unknown	-1.5	1,16E-11
MLOC_10223	Kelch-like proteinIPR011333 (BTB/POZ fold), IPR011705 (BTB/Kelch-associated)	35.1.9	not assigned.no ontology.BTB/POZ domain-containing protein	-1.6	0,000585087
MLOC_63489	Disease resistance proteinIPR000767 (Disease resistance protein), IPR001229 (Mannose-binding lectin)	20.1	stress.biotic	-1.6	4,06E-05
MLOC_80629	Mutator-like transposase	35.2	not assigned.unknown	-1.7	3,57E-16
MLOC_25763	'putative glucan 1,3-beta-glucosidase'IPR008999 (Actin cross-linking), IPR017853 (Glycoside hydrolase, superfamily)			-1.7	0,001757875
MLOC_16581	NBS-LRR disease resistance protein homologueIPR000767 (Disease resistance protein)	20.1	stress.biotic	-1.8	0,000236966
MLOC_28102	Unknown protein	35.2	not assigned.unknown	-1.8	6,96E-57
MLOC_16173	Pre-mRNA splicing factor ATP-dependent RNA helicase-like proteinIPR001650 (Helicase, C-terminal), IPR007502 (Helicase-associated domain), IPR011709 (Domain of unknown function DUF1605), IPR014001 (Helicase, superfamily 1/2, ATP-binding domain)	27.3.22.8	RNA.regulation of transcription.HB (Homeobox) transcription factor family.PHD subfamily	-1.8	0,007893396
MLOC_5043	Cysteine proteinaseIPR009038 (GOLD), IPR013201 (Proteinase inhibitor I29, cathepsin propeptide)	31.4	cell.vesicle transport	-1.8	0,007879663
MLOC_26429	Transposon protein, putative, ping/pong/SNOOPY sub-class	35.2	not assigned.unknown	-1.8	8,12E-65
MLOC_70652	Protein kinase-3IPR011009 (Protein kinase-like domain)	29.4	protein.postranslational modification	-1.8	3,07E-06
MLOC_31213	cDNA clone:J013022N21, full insert sequence	35.2	not assigned.unknown	-1.9	5,18E-29
MLOC_49738	MLOC_49738	20.2.99	stress.abiotic.unspecified	-1.9	0,001512404
MLOC_3707	Leucine-rich receptor-like protein kinase family protein LENGTH=1173IPR001611 (Leucine-rich repeat), IPR011009 (Protein kinase-like domain), IPR013210 (Leucine-rich repeat-containing N-terminal, type 2)	30.2.12	signalling.receptor kinases.leucine rich repeat XII	-2.0	0,000993531
MLOC_5395	BLE2 proteinIPR016024 (Armadillo-type fold)	26.13	misc.acid and other phosphatases	-2.0	0,001121595
MLOC_75680	Ulp1 protease family, C-terminal catalytic domain containing protein, expressed	35.2	not assigned.unknown	-2.1	1,71E-22
MLOC_53680	HAT dimerisation domain-containing protein-likeIPR008906 (HAT dimerisation), IPR012337 (Ribonuclease H-like domain)	35.2	not assigned.unknown	-2.1	4,81E-53
MLOC_497	Transposon protein, putative, CACTA, En/Spm sub-class	35.2	not assigned.unknown	-2.2	4,35E-94
MLOC_35134	Unknown protein	35.2	not assigned.unknown	-2.2	3,77E-28
MLOC_54756	Replication protein A 32 kDa subunitIPR014892 (Replication protein A, C-terminal), IPR016027 (Nucleic acid-binding, OB-fold-like)	35.2	not assigned.unknown	-2.3	1,23E-38
MLOC_58744	HXXXD-type acyl-transferase family protein LENGTH=428IPR003480 (Transferase), IPR023213 (Chloramphenicol acetyltransferase-like domain)	35.2	not assigned.unknown	-2.3	0,001527738
MLOC_57721	Glutathione S-transferaseIPR010987 (Glutathione S-transferase, C-terminal-like), IPR012336 (Thioredoxin-like fold)	26.9	misc.glutathione S transferases	-2.5	0,006040426
MLOC_43028	wall associated kinase 5 LENGTH=733IPR009030 (Growth factor, receptor)	30.2.25	signalling.receptor kinases.wall associated kinase	-2.5	1,03E-05
MLOC_10439	NBS-LRR disease resistance protein family-1IPR000767 (Disease resistance protein)	20.1	stress.biotic	-2.5	0,000676924
MLOC_75970	Transcriptional activator, TenA familyIPR016084 (Haem oxygenase-like, multi-helical)	35.2	not assigned.unknown	-2.7	0,007405702
MLOC_66868	Receptor-like protein kinase, putative,expressedIPR002902 (Gnk2-homologous domain), IPR011009 (Protein kinase-like domain)	30.2.17	signalling.receptor kinases.DUF 26	-2.7	0,001262179
MLOC_72965	CAP (Cysteine-rich secretory proteins, Antigen 5, and Pathogenesis-related 1 protein) superfamily protein LENGTH=161IPR001283 (Allergen V5/Tpx-1-related)	20.1	stress.biotic	-2.7	0,003164801
MLOC_61795	MLOC_61795			-2.7	2,20E-11
MLOC_80756	Kinase, putativeIPR008985 (Concanavalin A-like lectin/glucanase), IPR011009 (Protein kinase-like domain)	30.2.19	signalling.receptor kinases.legume-lectin	-2.8	0,0002128
MLOC_69042	MLOC_69042	29.6	protein.folding	-2.8	6,76E-32
MLOC_25288	Leucine-rich repeat receptor-like protein kinaseIPR001611 (Leucine-rich repeat), IPR013210 (Leucine-rich repeat-containing N-terminal, type 2)	30.2.12	signalling.receptor kinases.leucine rich repeat XII	-2.8	2,43E-05
MLOC_60542	MLOC_60542	26.3	misc.gluco-, galacto- and mannosidases	-2.9	0,004661546
MLOC_54452	DNA cross-link repair protein SNM1IPR011084 (DNA repair metallo-beta-lactamase), IPR013761 (Sterile alpha motif/pointed domain)	35.1	not assigned.no ontology	-2.9	0,006289823
MLOC_68687	Tropinone reductase 2IPR002198 (Short-chain dehydrogenase/reductase SDR)	16.4.1	secondary metabolism.N misc.alkaloid-like	-3.0	0,001544349
MLOC_81843	GDSL esterase/lipaseIPR001087 (Lipase, GDSL), IPR013830 (Esterase, SGNH hydrolase-type)	26.28	misc.GDSL-motif lipase	-3.0	0,003664753
MLOC_76086	rRNA methyltransferase, putativeIPR004441 (RNA methyltransferase TrmH family)	35.2	not assigned.unknown	-3.2	0,006309011
MLOC_60331	Reticulon family protein LENGTH=225IPR003388 (Reticulon)	35.2	not assigned.unknown	-3.3	0,004345919
MLOC_76003	Calcium-dependent protein kinaseIPR011009 (Protein kinase-like domain), IPR011992 (EF-hand-like domain)	30.3	signalling.calcium	-3.4	0,004036139
MLOC_64993	Receptor-like protein kinaseIPR000858 (S-locus glycoprotein), IPR001480 (Bulb-type lectin domain), IPR003609 (Apple-like), IPR011009 (Protein kinase-like domain)	29.4	protein.postranslational modification	-3.4	0,003885569
MLOC_16596	Disease resistance proteinIPR000767 (Disease resistance protein)	20.1	stress.biotic	-3.4	2,30E-07
MLOC_43235	MLOC_43235	29.5.9	protein.degradation.AAA type	-3.5	0,000789089
MLOC_24777	Zinc finger MYM-type protein	35.2	not assigned.unknown	-3.8	8,93E-09
MLOC_38010	MLOC_38010	17.6.1.2	hormone metabolism.gibberelin.synthesis-degradation.ent-kaurene synthase	-4.2	7,51E-31
MLOC_63821	Chlorophyll a-b binding protein C, chloroplasticIPR022796 (Chlorophyll A-B binding protein), IPR023329 (Chlorophyll a/b binding protein domain)	1.1.1.1	PS.lightreaction.photosystem II.LHC-II	-7.8	5,63E-58

## Sheet: commun_DEGs
List of commun genes which were differentially expressed in the spike of both silenced CKX1 lines (compared to wild-type/WT at stage 49.
Positive values reflect genes which were up-regulated in the transgenic line compared to the WT whereas negative values reflect genes which were down-regulated in the transgenic line compared to the WT.
Functional annotation was obtained from Mercator/Mapman
The expression of genes marked in yellow color was validated by qRT-PCR
				SC1-17.10		SC1-5.8
MLOC_ID	descritpion	BIN_number	BIN_description	log2FC	padj	log2FC	padj
MLOC_54756	Replication protein A 32 kDa subunitIPR014892 (Replication protein A, C-terminal), IPR016027 (Nucleic acid-binding, OB-fold-like)	35.2	not assigned.unknown	8.5	2.84e-34	9.0	1.23e-38
MLOC_26429	Transposon protein, putative, ping/pong/SNOOPY sub-class	35.2	not assigned.unknown	7.5	1.31e-61	7.7	8.12e-65
MLOC_53680	HAT dimerisation domain-containing protein-likeIPR008906 (HAT dimerisation), IPR012337 (Ribonuclease H-like domain)	35.2	not assigned.unknown	7.5	2.85e-42	8.3	4.81e-53
MLOC_20041	Lipid transfer proteinIPR016140 (Bifunctional inhibitor/plant lipid transfer protein/seed storage helical domain)	35.2	not assigned.unknown	6.4	2.59e-12	5.0	2.74e-07
MLOC_60700	Replication protein A 70 kDa DNA-binding subunitIPR016027 (Nucleic acid-binding, OB-fold-like)	28.99	DNA.unspecified	6.2	1.1e-11	6.4	6.73e-13
MLOC_58639	Cytokinin oxidase/dehydrogenase 1IPR016164 (FAD-linked oxidase-like, C-terminal), IPR016166 (FAD-binding, type 2)	17.4.1	hormone metabolism.cytokinin.synthesis-degradation	5.6	6.9e-19	5.6	3.74e-19
MLOC_57202	Retrotransposon protein, putative, unclassified	35.2	not assigned.unknown	4.8	1.91e-08	4.7	3.79e-08
MLOC_44678	12-oxophytodienoate reductase 2IPR013785 (Aldolase-type TIM barrel)	17.7.1.5	hormone metabolism.jasmonate.synthesis-degradation.12-Oxo-PDA-reductase	3.7	2.88e-07	3.4	2.91e-06
MLOC_9548	Retrotransposon protein, putative, unclassifiedIPR000477 (Reverse transcriptase)	35.2	not assigned.unknown	3.6	0.000101589	3.2	0.000913341
MLOC_17138	receptor-like protein kinase-related family protein LENGTH=263IPR002902 (Gnk2-homologous domain)	35.2	not assigned.unknown	3.6	6.44e-09	3.4	6.42e-08
MLOC_36262	MLOC_36262	35.2	not assigned.unknown	3.0	3.69e-05	3.1	5.02e-06
MLOC_68332	Retrotransposon protein, putative, unclassifiedIPR000477 (Reverse transcriptase)	35.2	not assigned.unknown	3.0	0.000306831	2.6	0.0031695
MLOC_56741	Retrotransposon protein, putative, LINE subclass, expressedIPR005135 (Endonuclease/exonuclease/phosphatase)	35.2	not assigned.unknown	2.6	0.00057192	2.4	0.00194362
MLOC_57491	Retrotransposon protein, putative, unclassified	35.2	not assigned.unknown	2.4	6.44e-09	2.3	5.03e-08
MLOC_60586	GrpE protein homolog	35.2	not assigned.unknown	2.3	1.83e-07	-1.7	0.00171679
MLOC_56298	Retrotransposon protein, putative, unclassified	35.2	not assigned.unknown	2.0	2.49e-05	-2.1	3.94e-05
MLOC_53891	Unknown protein	35.2	not assigned.unknown	1.7	0.000232874	1.9	1.64e-05
MLOC_240	NAM-like protein	35.2	not assigned.unknown	1.7	0.000794098	3.0	6.76e-15
MLOC_64735	basic helix-loop-helix (bHLH) DNA-binding superfamily protein LENGTH=328IPR011598 (Helix-loop-helix DNA-binding)	27.3.6	RNA.regulation of transcription.bHLH transcription factor family	1.7	0.000578696	2.4	1.22e-09
MLOC_25093	Unknown protein	35.2	not assigned.unknown	1.6	4.71e-06	2.7	5.4e-21
MLOC_26807	unknown protein Has 54 Blast hits to 54 proteins in 22 species: Archae - 0 Bacteria - 0 Metazoa - 29 Fungi - 0 Plants - 24 Viruses - 0 Other Eukaryotes - 1 (source: NCBI BLink). LENGTH=642	35.2	not assigned.unknown	1.4	1.05e-27	1.3	3.06e-24
MLOC_19463	Cell division cycle protein, putativeIPR009772 (D123)	20.2	stress.abiotic	-0.4	0.00686391	-0.4	0.000928694
MLOC_51081	Pentatricopeptide repeat-containing proteinIPR002885 (Pentatricopeptide repeat), IPR011990 (Tetratricopeptide-like helical)	35.1.5	not assigned.no ontology.pentatricopeptide (PPR) repeat-containing protein	-0.6	0.000980004	-0.6	0.00493099
MLOC_66229	Unknown proteinIPR011676 (Domain of unknown function DUF1618)	35.2	not assigned.unknown	-1.0	0.00581484	1.0	0.00117654
MLOC_60542	MLOC_60542	26.3	misc.gluco-, galacto- and mannosidases	-3.1	0.00497921	-2.9	0.00466155
