# Supplementary material for: Modification of Barley Plant Productivity Through Regulation of Cytokinin Content by Reverse-Genetics Approaches
Source: Front Plant Sci. 2018 Nov 27;9:1676. doi: 10.3389/fpls.2018.01676 (PMC6277847; doi:10.3389/fpls.2018.01676)
Supplement: Supplementary file 9 [file Table_9.xlsx]

## Sheet: KD-CKX1_17.10
List of differentially expressed genes in the spike of the silenced CKX1 line SC1-17.10 (compared to wild-type/WT) at stage 59.
Positive values reflect genes which were up-regulated in the transgenic line compared to the WT whereas negative values reflect genes which were down-regulated in the transgenic line compared to the WT.
FC: fold change
Functional annotation was obtained from Mercator/Mapman
The expression of genes marked in yellow color was validated by qRT-PCR
MLOC_ID	Description	BIN_number	BIN_description	log2FC	padj		total DEGs		45		100
MLOC_69825	D-arabinono-1,4-lactone oxidase family protein LENGTH=591IPR007173 (D-arabinono-1,4-lactone oxidase), IPR010030 (Plant-specific FAD-dependent oxidoreductase), IPR016164 (FAD-linked oxidase-like, C-terminal), IPR016166 (FAD-binding, type 2)	35.2	not assigned.unknown	6.9	0.00535747		Bin category		up		down
MLOC_68758	Hypersensitive-induced response protein, putative, expressedIPR001107 (Band 7 protein)	35.2	not assigned.unknown	6.6	0.00310385				#	%	#	%
MLOC_76936	5'-methylthioadenosine/S-adenosylhomocysteine nucleosidaseIPR018017 (Nucleoside phosphorylase)	35.2	not assigned.unknown	5.9	2.96e-05		minor CHO	3	1	0.0222222		0
MLOC_54756	Replication protein A 32 kDa subunitIPR014892 (Replication protein A, C-terminal), IPR016027 (Nucleic acid-binding, OB-fold-like)	35.2	not assigned.unknown	5.8	3.72e-21		glycolysis	4		0	1	0.01
MLOC_26429	Transposon protein, putative, ping/pong/SNOOPY sub-class	35.2	not assigned.unknown	5.4	6.17e-83		TCA	8		0	1	0.01
MLOC_63339	Dicer-like proteinIPR000999 (Ribonuclease III domain), IPR001159 (Double-stranded RNA-binding), IPR001650 (Helicase, C-terminal), IPR003100 (Argonaute/Dicer protein, PAZ), IPR005034 (Dicer double-stranded RNA-binding fold)	27.3.30	RNA.regulation of transcription.Trihelix transcription factor family	5.3	0.00686787		cell wall	10	1	0.0222222		0
MLOC_60700	Replication protein A 70 kDa DNA-binding subunitIPR016027 (Nucleic acid-binding, OB-fold-like)	28.99	DNA.unspecified	4.7	1.31e-06		lipid metabolism	11	1	0.0222222	1	0.01
MLOC_36732	Villin-4IPR007122 (Gelsolin)	31.1.1.1.3	cell.organisation.cytoskeleton.actin.actin binding	4.3	8.09e-06		AA metabolism	13	1	0.0222222	1	0.01
MLOC_76259	GRAM domain-containing protein / ABA-responsive protein-related LENGTH=219IPR004182 (GRAM)	17.1.3	hormone metabolism.abscisic acid.induced-regulated-responsive-activated	4.1	1.15e-13		metal handling	15		0	4	0.04
MLOC_53680	HAT dimerisation domain-containing protein-likeIPR008906 (HAT dimerisation), IPR012337 (Ribonuclease H-like domain)	35.2	not assigned.unknown	3.9	3.96e-37		secondary metabolism	16	1	0.0222222	3	0.03
MLOC_28370	MLOC_28370	34.2	transport.sugars	3.8	1.97e-06		hormones metabolism	17	2	0.0444444	2	0.02
MLOC_27199	Unknown protein	35.2	not assigned.unknown	3.5	8.97e-09		stress	20	2	0.0444444	10	0.1
MLOC_8115	3-ketoacyl-CoA synthaseIPR012392 (Very-long-chain 3-ketoacyl-CoA synthase), IPR016039 (Thiolase-like)	16.7	secondary metabolism.wax	3.1	3.18e-05		redox	21		0	1	0.01
MLOC_38677	Flavoprotein wrbAIPR005025 (NADPH-dependent FMN reductase), IPR010089 (Flavoprotein WrbA)	11.8	lipid metabolism.exotics(steroids, squalene etc)	3.0	0.00838988		misc.	26	2	0.0444444	14	0.14
MLOC_58438	Nitrate transporter, putativeIPR011701 (Major facilitator superfamily), IPR016196 (Major facilitator superfamily domain, general substrate transporter)	34.1	transport.p- and v-ATPases	3.0	0.00148494		RNA	27	4	0.0888889	4	0.04
MLOC_36262	MLOC_36262	35.2	not assigned.unknown	2.8	3.66e-10		DNA	28	2	0.0444444		0
MLOC_57202	Retrotransposon protein, putative, unclassified	35.2	not assigned.unknown	2.8	5.92e-05		protein	29		0	6	0.06
MLOC_55014	MLOC_55014	34.15	transport.potassium	2.6	0.000900227		signalling	30		0	3	0.03
MLOC_9548	Retrotransposon protein, putative, unclassifiedIPR000477 (Reverse transcriptase)	35.2	not assigned.unknown	2.6	0.00227345		cell	31	1	0.0222222	1	0.01
MLOC_56741	Retrotransposon protein, putative, LINE subclass, expressedIPR005135 (Endonuclease/exonuclease/phosphatase)	35.2	not assigned.unknown	2.6	0.000382432		development	33		0	4	0.04
MLOC_33151	Sugar transporter ERD6-like 5	35.2	not assigned.unknown	2.6	0.00854271		transport	34	3	0.0666667	9	0.09
MLOC_43997	F-box-like proteinIPR001810 (F-box domain, cyclin-like), IPR011044 (Quinoprotein amine dehydrogenase, beta chain-like)	35.2	not assigned.unknown	2.6	6.26e-05		not assigned	35	24	0.533333	35	0.35
MLOC_17138	receptor-like protein kinase-related family protein LENGTH=263IPR002902 (Gnk2-homologous domain)	35.2	not assigned.unknown	2.5	0.00021499				45		100
MLOC_58639	Cytokinin oxidase/dehydrogenase 1IPR016164 (FAD-linked oxidase-like, C-terminal), IPR016166 (FAD-binding, type 2)	17.4.1	hormone metabolism.cytokinin.synthesis-degradation	2.4	0.00391472
MLOC_57491	Retrotransposon protein, putative, unclassified	35.2	not assigned.unknown	2.3	6.87e-07
MLOC_56299	Retrotransposon protein, putative, unclassifiedIPR000477 (Reverse transcriptase)	35.2	not assigned.unknown	2.2	0.000580623
MLOC_240	NAM-like protein	35.2	not assigned.unknown	2.2	0.00100057
MLOC_36712	NBS-LRR resistance-like protein	35.2	not assigned.unknown	2.0	7.17e-07
MLOC_17662	myb domain protein 30 LENGTH=323IPR009057 (Homeodomain-like), IPR015495 (Myb transcription factor)	27.1.20	RNA.processing.degradation dicer	1.9	0.00632592
MLOC_56230	Plant protein 1589 of unknown function LENGTH=91IPR006476 (Conserved hypothetical protein CHP01589, plant)	35.2	not assigned.unknown	1.8	0.000142716
MLOC_65390	PectinesteraseIPR006501 (Pectinesterase inhibitor), IPR011050 (Pectin lyase fold/virulence factor)	10.8.1	cell wall.pectin*esterases.PME	1.8	0.00679922
MLOC_80686	Leaf rust resistance protein Lr10	20.1	stress.biotic	1.8	8.79e-05
MLOC_53891	Unknown protein	35.2	not assigned.unknown	1.7	4.87e-07
MLOC_22823	Glutathione S-transferaseIPR004045 (Glutathione S-transferase, N-terminal), IPR004046 (Glutathione S-transferase, C-terminal)	26.21	misc.protease inhibitor/seed storage/lipid transfer protein (LTP) family protein	1.7	0.00061307
MLOC_73666	Unknown proteinIPR009606 (Protein of unknown function DUF1218)	35.2	not assigned.unknown	1.4	0.00686787
MLOC_57686	Disease resistance protein (CC-NBS-LRR class) family LENGTH=908IPR000767 (Disease resistance protein)	20.1	stress.biotic	1.2	0.00761179
MLOC_56298	Retrotransposon protein, putative, unclassified	35.2	not assigned.unknown	1.0	0.000102665
MLOC_14785	TCP family transcription factor containing proteinIPR005333 (Transcription factor, TCP)	27.3.29	RNA.regulation of transcription.TCP transcription factor family	0.8	0.000745409
MLOC_52865	Oxidoreductase, zinc-containing alcohol dehydrogenase familyIPR002085 (Alcohol dehydrogenase superfamily, zinc-type), IPR011032 (GroES-like), IPR013149 (Alcohol dehydrogenase, C-terminal), IPR016040 (NAD(P)-binding domain)	26.19	misc.plastocyanin-like	0.8	7.55e-05
MLOC_15695	Transcription factor, putative	27.3.25	RNA.regulation of transcription.MYB transcription factor family	0.8	1.77e-08
MLOC_7150	Alanine aminotransferase 2, putative, expressedIPR001176 (1-aminocyclopropane-1-carboxylate synthase), IPR015424 (Pyridoxal phosphate-dependent transferase, major domain)	13.1.1.3.1	amino acid metabolism.synthesis.central amino acid metabolism.alanine.alanine aminotransferase	0.7	0.00687735
MLOC_13987	ATP-dependent DNA helicase mph1IPR001650 (Helicase, C-terminal)	28.1	DNA.synthesis/chromatin structure	0.6	2.93e-05
MLOC_36809	glucan synthase-like 7 LENGTH=1958IPR003440 (Glycosyl transferase, family 48)	3.6	minor CHO metabolism.callose	0.6	0.00686787
MLOC_25093	Unknown protein	35.2	not assigned.unknown	0.5	2.98e-06
MLOC_26807	unknown protein Has 54 Blast hits to 54 proteins in 22 species: Archae - 0 Bacteria - 0 Metazoa - 29 Fungi - 0 Plants - 24 Viruses - 0 Other Eukaryotes - 1 (source: NCBI BLink). LENGTH=642	35.2	not assigned.unknown	0.5	2.62e-28
MLOC_56785	MLOC_56785	8.1.4	TCA / org transformation.TCA.IDH	-0.6	0.00664568
MLOC_56629	Major facilitator superfamily antiporter, putative, expressedIPR011701 (Major facilitator superfamily), IPR016196 (Major facilitator superfamily domain, general substrate transporter)	34.16	transport.ABC transporters and multidrug resistance systems	-1.0	5.08e-05
MLOC_70609	unknown protein INVOLVED IN: biological_process unknown LOCATED IN: chloroplast stroma, chloroplast EXPRESSED IN: 23 plant structures EXPRESSED DURING: 13 growth stages Has 118 Blast hits to 118 proteins in 41 species: Archae - 0 Bacteria - 42 Metazoa - 0 Fungi - 0 Plants - 56 Viruses - 0 Other Eukaryotes - 20 (source: NCBI BLink). LENGTH=425IPR011990 (Tetratricopeptide-like helical)	35.2	not assigned.unknown	-1.0	0.000132461
MLOC_5462	unknown protein FUNCTIONS IN: molecular_function unknown INVOLVED IN: biological_process unknown LOCATED IN: chloroplast EXPRESSED IN: 22 plant structures EXPRESSED DURING: 13 growth stages. LENGTH=517IPR022552 (Uncharacterised protein family Ycf55)	35.2	not assigned.unknown	-1.1	0.00346534
MLOC_17690	BZIP transcription factorIPR004827 (Basic-leucine zipper domain)	27.3.99	RNA.regulation of transcription.unclassified	-1.2	0.000197526
MLOC_54160	FBD-associated F-box proteinIPR001810 (F-box domain, cyclin-like)	29.5.11.4.3.2	protein.degradation.ubiquitin.E3.SCF.FBOX	-1.3	0.00227982
MLOC_79223	Transcription factor, putativeIPR004827 (Basic-leucine zipper domain)	27.3.44	RNA.regulation of transcription.Chromatin Remodeling Factors	-1.3	0.00259369
MLOC_14101	O-methyltransferaseIPR016461 (O-methyltransferase, COMT, eukaryota)	26.28	misc.GDSL-motif lipase	-1.6	1.43e-06
MLOC_61005	Eukaryotic initiation factor 4A (ATP-dependent RNA helicase eIF4A)IPR001650 (Helicase, C-terminal), IPR014001 (Helicase, superfamily 1/2, ATP-binding domain), IPR014014 (RNA helicase, DEAD-box type, Q motif)	29.2.3	protein.synthesis.initiation	-1.7	2.22e-05
MLOC_3707	Leucine-rich receptor-like protein kinase family protein LENGTH=1173IPR001611 (Leucine-rich repeat), IPR011009 (Protein kinase-like domain), IPR013210 (Leucine-rich repeat-containing N-terminal, type 2)	30.2.12	signalling.receptor kinases.leucine rich repeat XII	-1.7	0.0057972
MLOC_67381	Phosphoenolpyruvate carboxylase, putativeIPR021135 (Phosphoenolpyruvate carboxylase)	4.1.15	glycolysis.cytosolic branch.phospho-enol-pyruvate carboxylase (PEPC)	-2.1	2.7e-06
MLOC_78131	Leucine-rich receptor-like protein kinase family protein LENGTH=1101IPR001611 (Leucine-rich repeat), IPR011009 (Protein kinase-like domain), IPR013210 (Leucine-rich repeat-containing N-terminal, type 2), IPR013320 (Concanavalin A-like lectin/glucanase, subgroup)	30.2.12	signalling.receptor kinases.leucine rich repeat XII	-2.2	0.00469188
MLOC_67715	Acidic endochitinaseIPR017853 (Glycoside hydrolase, superfamily)	20.1.7	stress.biotic.PR-proteins	-2.2	0.00139224
MLOC_70248	Tobamovirus multiplication 2B	35.2	not assigned.unknown	-2.3	0.00686787
MLOC_16313	Leucine-rich repeat protein kinase-like proteinIPR001611 (Leucine-rich repeat)	29.4	protein.postranslational modification	-2.4	0.00792139
MLOC_37297	Nodulin MtN21 /EamA-like transporter-like proteinIPR000620 (Drug/metabolite transporter)	33.99	development.unspecified	-2.5	0.00278369
MLOC_66229	Unknown proteinIPR011676 (Domain of unknown function DUF1618)	35.2	not assigned.unknown	-2.7	0.000959048
MLOC_34816	Legumin-like proteinIPR011051 (Cupin, RmlC-type)	33.1	development.storage proteins	-2.7	0.00529489
MLOC_25036	DNA repair helicase rad5,16, putativeIPR001650 (Helicase, C-terminal)	27.3.35	RNA.regulation of transcription.bZIP transcription factor family	-2.8	0.00606296
MLOC_81185	Auxin transporter-like protein 3IPR013057 (Amino acid transporter, transmembrane)	17.2.2	hormone metabolism.auxin.signal transduction	-2.8	0.00856485
MLOC_64089	4-coumarate-coa ligaseIPR000873 (AMP-dependent synthetase/ligase)	16.2.1.3	secondary metabolism.phenylpropanoids.lignin biosynthesis.4CL	-2.9	0.00100057
MLOC_71550	Protein of unknown function, DUF538 LENGTH=143IPR007493 (Protein of unknown function DUF538)	35.2	not assigned.unknown	-2.9	1.59e-09
MLOC_60187	Protein disulfide isomeraseIPR005746 (Thioredoxin), IPR012336 (Thioredoxin-like fold)	21.1.1	redox.thioredoxin.PDIL	-2.9	0.000982136
MLOC_10385	Unknown protein	35.2	not assigned.unknown	-3.2	0.00687735
MLOC_10849	Protein kinase, putativeIPR011009 (Protein kinase-like domain), IPR013320 (Concanavalin A-like lectin/glucanase, subgroup)	29.4	protein.postranslational modification	-3.3	0.00278369
MLOC_16007	Flavonol 4-sulfotransferaseIPR000863 (Sulfotransferase domain)	11.8	lipid metabolism.exotics(steroids, squalene etc)	-3.5	0.00535747
MLOC_62646	Unknown protein	35.2	not assigned.unknown	-3.5	0.00310385
MLOC_70963	Major facilitator superfamily antiporterIPR011701 (Major facilitator superfamily), IPR016196 (Major facilitator superfamily domain, general substrate transporter)	34.13	transport.peptides and oligopeptides	-3.6	0.00664568
MLOC_55770	O-methyltransferaseIPR016461 (O-methyltransferase, COMT, eukaryota)	26.12	misc.peroxidases	-3.8	7.67e-07
MLOC_65003	Micronuclear linker histone polyprotein, putative	35.2	not assigned.unknown	-3.8	0.00686787
MLOC_38579	Poly(RC)-binding protein, putativeIPR004088 (K Homology domain, type 1)	27.3.35	RNA.regulation of transcription.bZIP transcription factor family	-3.8	2.29e-05
MLOC_5994	ATP-binding cassette transporter, putativeIPR003439 (ABC transporter-like), IPR013525 (ABC-2 type transporter), IPR013581 (Plant PDR ABC transporter associated)	34.16	transport.ABC transporters and multidrug resistance systems	-3.8	0.00402235
MLOC_3645	GDSL esterase/lipaseIPR001087 (Lipase, GDSL), IPR013830 (Esterase, SGNH hydrolase-type)	26.12	misc.peroxidases	-3.9	0.000397857
MLOC_71338	MLOC_71338	20.2.2	stress.abiotic.cold	-3.9	0.00111978
MLOC_74055	NAC domain protein,	35.2	not assigned.unknown	-3.9	0.00595916
MLOC_33896	Bifunctional inhibitor/lipid-transfer protein/seed storage 2S albumin superfamily protein LENGTH=149IPR016140 (Bifunctional inhibitor/plant lipid transfer protein/seed storage helical domain)	26.12	misc.peroxidases	-3.9	0.00535747
MLOC_76264	Unknown protein	35.2	not assigned.unknown	-4.0	0.00119337
MLOC_60447	Germin-like protein 5aIPR001929 (Germin), IPR011051 (Cupin, RmlC-type)	15.2	metal handling.binding, chelation and storage	-4.0	0.00278369
MLOC_65674	Blue copper proteinIPR008972 (Cupredoxin)	26.7	misc.oxidases - copper, flavone etc	-4.0	0.00259369
MLOC_55629	AquaporinIPR000425 (Major intrinsic protein), IPR023271 (Aquaporin-like)	34.19.2	transport.Major Intrinsic Proteins.TIP	-4.1	0.00687735
MLOC_34127	Tyrosine-rich hydroxyproline-rich glycoproteinIPR006041 (Pollen Ole e 1 allergen/extensin)	35.2	not assigned.unknown	-4.1	0.00239429
MLOC_17989	Potassium transporter, putativeIPR003855 (K+ potassium transporter)	34.15	transport.potassium	-4.1	0.0048386
MLOC_31393	MLOC_31393	20.2.2	stress.abiotic.cold	-4.1	0.00356934
MLOC_72685	Similarity to late embryogenesis abundant proteinIPR009646 (Root cap)	33.2	development.late embryogenesis abundant	-4.1	0.00686787
MLOC_7085	Peroxidase 1IPR010255 (Haem peroxidase)	20.2.2	stress.abiotic.cold	-4.2	0.0057269
MLOC_70399	PeroxidaseIPR010255 (Haem peroxidase)	26.12	misc.peroxidases	-4.2	1.67e-06
MLOC_51295	Patatin T5IPR016035 (Acyl transferase/acyl hydrolase/lysophospholipase)	33.1	development.storage proteins	-4.2	2.93e-05
MLOC_28020	Unknown protein	35.2	not assigned.unknown	-4.2	0.00282108
MLOC_30710	HAT dimerisation domain-containing protein-likeIPR003656 (Zinc finger, BED-type predicted)	35.1	not assigned.no ontology	-4.3	0.001392
MLOC_54892	Peroxidase 10IPR010255 (Haem peroxidase)	26.12	misc.peroxidases	-4.3	6.87e-07
MLOC_55855	Loricrin	35.2	not assigned.unknown	-4.3	0.0080977
MLOC_62331	PeroxidaseIPR010255 (Haem peroxidase)	26.9	misc.glutathione S transferases	-4.3	0.00168052
MLOC_53549	Laccase 1IPR017761 (Laccase)	16.10	secondary metabolism.simple phenols	-4.3	0.00070629
MLOC_36591	Disease resistance proteinIPR002182 (NB-ARC)	20.1	stress.biotic	-4.4	0.00266958
MLOC_72076	Peroxidase 10IPR010255 (Haem peroxidase)	26.12	misc.peroxidases	-4.4	0.00230028
MLOC_14435	Unknown proteinIPR003496 (ABA/WDS induced protein)	35.1	not assigned.no ontology	-4.4	0.00551383
MLOC_77155	MLOC_77155	35.2	not assigned.unknown	-4.4	0.00036002
MLOC_10425	Disease resistance protein (CC-NBS-LRR class) family LENGTH=908IPR000767 (Disease resistance protein)	20.1	stress.biotic	-4.5	0.00183089
MLOC_78452	Polyamine oxidase, putativeIPR001613 (Flavin amine oxidase)	22.2.1	polyamine metabolism.degradation.polyamin oxidase	-4.5	0.00254191
MLOC_12459	metacaspase 1 LENGTH=367IPR011600 (Peptidase C14, caspase catalytic)	29.5	protein.degradation	-4.5	0.00259505
MLOC_43678	Unknown protein	35.2	not assigned.unknown	-4.5	0.00116648
MLOC_74605	PeroxidaseIPR010255 (Haem peroxidase)	26.12	misc.peroxidases	-4.5	0.00119337
MLOC_75956	Metallothionein-like proteinIPR000347 (Metallothionein, family 15, plant)	35.1	not assigned.no ontology	-4.5	0.00152495
MLOC_40798	MLOC_40798	35.2	not assigned.unknown	-4.5	0.000399515
MLOC_4361	Tyrosine aminotransferase 2IPR001176 (1-aminocyclopropane-1-carboxylate synthase), IPR021178 (Tyrosine transaminase)	13.2.6.2	amino acid metabolism.degradation.aromatic aa.tyrosine	-4.5	0.00142252
MLOC_15580	Potassium transporter, putativeIPR003855 (K+ potassium transporter)	34.4	transport.nitrate	-4.6	0.00371642
MLOC_55574	Protein kinase family proteinIPR000742 (Epidermal growth factor-like domain), IPR011009 (Protein kinase-like domain)	30.2.25	signalling.receptor kinases.wall associated kinase	-4.7	0.000900227
MLOC_70539	ankyrin repeat family protein LENGTH=616IPR020683 (Ankyrin repeat-containing domain)	31.1	cell.organisation	-4.7	0.000940447
MLOC_78101	Nicotianamine synthase 1, putative, expressedIPR004298 (Nicotianamine synthase)	15.2	metal handling.binding, chelation and storage	-4.9	7.23e-07
MLOC_73808	Germin-like protein 5aIPR001929 (Germin), IPR011051 (Cupin, RmlC-type)	15.2	metal handling.binding, chelation and storage	-5.0	5.79e-05
MLOC_71162	Unknown protein	35.2	not assigned.unknown	-5.0	2.16e-05
MLOC_34709	1-aminocyclopropane-1-carboxylate oxidaseIPR005123 (Oxoglutarate/iron-dependent oxygenase)	17.5.1.2	hormone metabolism.ethylene.synthesis-degradation.1-aminocyclopropane-1-carboxylate oxidase	-5.0	0.000212426
MLOC_64486	PeroxidaseIPR010255 (Haem peroxidase)	26.12	misc.peroxidases	-5.1	0.00349478
MLOC_39332	MLOC_39332	26.6	misc.O-methyl transferases	-5.3	0.00942501
MLOC_66094	AquaporinIPR000425 (Major intrinsic protein), IPR023271 (Aquaporin-like)	34.19.2	transport.Major Intrinsic Proteins.TIP	-5.3	1.21e-05
MLOC_22335	Major facilitator superfamily protein LENGTH=557IPR000109 (Oligopeptide transporter), IPR016196 (Major facilitator superfamily domain, general substrate transporter)	34.16	transport.ABC transporters and multidrug resistance systems	-5.3	0.00761179
MLOC_68042	Cysteine proteinaseIPR013128 (Peptidase C1A, papain)	29.5.3	protein.degradation.cysteine protease	-5.6	2.35e-05
MLOC_71584	Peroxidase 2IPR010255 (Haem peroxidase)	20.2.99	stress.abiotic.unspecified	-5.6	1.36e-06
MLOC_57100	O-methyltransferase 5IPR016461 (O-methyltransferase, COMT, eukaryota)	16.2.1.9	secondary metabolism.phenylpropanoids.lignin biosynthesis.COMT	-5.6	8.81e-06
MLOC_61102	Peroxidase 1IPR010255 (Haem peroxidase)	20.2.2	stress.abiotic.cold	-5.6	1.08e-09
MLOC_11583	BURP domain-containing protein 11IPR004873 (BURP domain)	20.2.3	stress.abiotic.drought/salt	-5.8	2.7e-06
MLOC_27023	HAT family dimerization domain containing protein	35.2	not assigned.unknown	-5.8	1.39e-11
MLOC_1826	Peroxidase 52IPR010255 (Haem peroxidase)	26.12	misc.peroxidases	-5.9	0.00251284
MLOC_27949	Unknown protein	35.2	not assigned.unknown	-6.0	6.01e-17
MLOC_52920	H-ATPaseIPR004014 (ATPase, P-type cation-transporter, N-terminal), IPR005834 (Haloacid dehalogenase-like hydrolase), IPR008250 (ATPase, P-type, ATPase-associated domain)	34.7	transport.phosphate	-6.0	0.00686787
MLOC_73507	MLOC_73507	26.6	misc.O-methyl transferases	-6.1	0.00230028
MLOC_40205	Transposon protein, putative, CACTA, En/Spm sub-class	35.2	not assigned.unknown	-6.1	5.49e-18
MLOC_56153	Nicotianamine synthase 1, putative, expressedIPR004298 (Nicotianamine synthase)	15.2	metal handling.binding, chelation and storage	-6.1	7.7e-07
MLOC_67879	MLOC_67879	35.2	not assigned.unknown	-6.2	4.34e-07
MLOC_74463	Germin AIPR001929 (Germin), IPR011051 (Cupin, RmlC-type)	20.2.2	stress.abiotic.cold	-6.2	1.78e-05
MLOC_48096	Transposon protein, putative, CACTA, En/Spm sub-class	35.2	not assigned.unknown	-6.5	1.11e-14
MLOC_31095	Transposon protein, putative, CACTA, En/Spm sub-class	35.2	not assigned.unknown	-6.9	3.22e-25
MLOC_26287	Transposon protein, putative, CACTA, En/Spm sub-class	35.2	not assigned.unknown	-7.1	5.33e-21
MLOC_490	Unknown protein	35.2	not assigned.unknown	-7.1	5.11e-32
MLOC_49609	ATP synthase subunit-like protein	35.2	not assigned.unknown	-7.3	3.96e-37
MLOC_52761	Transposon protein, putative, CACTA, En/Spm sub-class	35.2	not assigned.unknown	-7.4	1.03e-29
MLOC_46817	Transposon protein, putative, CACTA, En/Spm sub-classIPR004242 (Transposon, En/Spm-like)	35.2	not assigned.unknown	-7.7	3.59e-35
MLOC_47391	ATP synthase subunit-like proteinIPR004252 (Transposase, Ptta/En/Spm, plant)	35.2	not assigned.unknown	-8.2	9.92e-76
MLOC_52240	ATP synthase subunit-like protein	35.2	not assigned.unknown	-8.5	8.18e-58
MLOC_312	MAR-binding protein, putative, expressed	35.2	not assigned.unknown	-9.1	6.67e-73

## Sheet: KD-CKX1_5.8
List of differentially expressed genes in the spike of the silenced CKX1 line SC1-5.8 (compared to wild-type/WT) at stage 59.
Positive values reflect genes which were up-regulated in the transgenic line compared to the WT whereas negative values reflect genes which were down-regulated in the transgenic line compared to the WT.
Functional annotation was obtained from Mercator/Mapman
The expression of genes marked in yellow color was validated by qRT-PCR
MLOC_ID	Description	BIN_number	BIN_description	log2FC	padj
MLOC_67879	MLOC_67879	35.2	not assigned.unknown	8.8	6.02747e-08
MLOC_65390	PectinesteraseIPR006501 (Pectinesterase inhibitor), IPR011050 (Pectin lyase fold/virulence factor)	10.8.1	cell wall.pectin*esterases.PME	8.6	0.000164621		total DEGs		107		121
MLOC_60586	GrpE protein homolog	35.2	not assigned.unknown	8.4	1.00942e-18		Bin category		up		down
MLOC_76264	Unknown protein	35.2	not assigned.unknown	7.9	6.43086e-08				#	%	#	%
MLOC_71162	Unknown protein	35.2	not assigned.unknown	7.1	9.53532e-06		PS	1	1	0.00934579		0
MLOC_75956	Metallothionein-like proteinIPR000347 (Metallothionein, family 15, plant)	35.2	not assigned.unknown	7.0	0.00041794		major CHO	2		0	1	0.00826446
MLOC_40798	MLOC_40798	35.2	not assigned.unknown	6.9	0.000169454		minor CHO	3	1	0.00934579		0
MLOC_77155	MLOC_77155	35.2	not assigned.unknown	6.5	0.000382707		glycolysis	4		0	3	0.0247934
MLOC_28370	MLOC_28370	34.2	transport.sugars	6.2	1.51277e-05		cell wall	10	1	0.00934579	1	0.00826446
MLOC_61421	F-box-like proteinIPR001810 (F-box domain, cyclin-like)	35.2	not assigned.unknown	6.2	0.00700898		lipid metabolism	11	1	0.00934579	2	0.0165289
MLOC_43678	Unknown protein	35.2	not assigned.unknown	6.0	0.00834477		AA metabolism	13		0	1	0.00826446
MLOC_34127	Tyrosine-rich hydroxyproline-rich glycoproteinIPR006041 (Pollen Ole e 1 allergen/extensin)	35.2	not assigned.unknown	5.9	0.00270541		metal handling	15		0	3	0.0247934
MLOC_25236	Retrotransposon protein, putative, unclassified	35.2	not assigned.unknown	5.4	0.000502495		secondary metabolism	16	2	0.0186916	3	0.0247934
MLOC_56689	Unknown proteinIPR022059 (Protein of unknown function DUF3615)	35.2	not assigned.unknown	5.1	1.78592e-12		hormones metabolism	17	2	0.0186916	6	0.0495868
MLOC_58438	Nitrate transporter, putativeIPR011701 (Major facilitator superfamily), IPR016196 (Major facilitator superfamily domain, general substrate transporter)	34.15	transport.potassium	5.1	0.00376901		co-factors and vitamins metabolism	18	3	0.0280374		0
MLOC_9701	Unknown protein	35.2	not assigned.unknown	4.9	0.00204198		tetrapyrrole synthesis	19	1	0.00934579		0
MLOC_51560	Putative adipose-regulatory protein (Seipin) LENGTH=368IPR009617 (Adipose-regulatory protein, Seipin)	35.2	not assigned.unknown	4.9	0.00714832		stress	20	3	0.0280374	10	0.0826446
MLOC_71550	Protein of unknown function, DUF538 LENGTH=143IPR007493 (Protein of unknown function DUF538)	35.2	not assigned.unknown	4.7	0.000730167		redox	21		0	3	0.0247934
MLOC_77943	ATP-dependent zinc metalloprotease FtsH 1IPR003959 (ATPase, AAA-type, core)	29.2.1.99.99	protein.synthesis.ribosomal protein.unknown.unknown	4.7	0.00148643		misc.	26	4	0.0373832	22	0.181818
MLOC_12203	F-box domain containing proteinIPR005174 (Protein of unknown function DUF295)	35.2	not assigned.unknown	4.5	3.08154e-05		RNA	27	8	0.0747664	8	0.0661157
MLOC_13510	Plant protein of unknown function (DUF639) LENGTH=691IPR006927 (Protein of unknown function DUF639)	35.2	not assigned.unknown	4.3	0.00422283		DNA	28	2	0.0186916	1	0.00826446
MLOC_66646	Cyclin-dependent kinase inhibitor 2IPR003175 (Cyclin-dependent kinase inhibitor)	35.2	not assigned.unknown	4.3	0.00301679		protein	29	6	0.0560748	10	0.0826446
MLOC_5299	Protein of unknown function (DUF1639) LENGTH=352IPR012438 (Protein of unknown function DUF1639)	35.2	not assigned.unknown	4.3	0.00973892		signalling	30		0	5	0.0413223
MLOC_12298	Plant protein of unknown function (DUF828) with plant pleckstrin homology-like region LENGTH=453IPR008546 (Domain of unknown function DUF828), IPR013666 (Pleckstrin-like, plant)	35.2	not assigned.unknown	4.2	0.00929875		cell	31	3	0.0280374	2	0.0165289
MLOC_11485	NB-ARC domain-containing disease resistance protein LENGTH=926IPR001229 (Mannose-binding lectin), IPR002182 (NB-ARC)	20.1	stress.biotic	4.2	7.49097e-05		development	33		0	4	0.0330579
MLOC_16169	unknown protein BEST Arabidopsis thaliana protein match is: unknown protein . LENGTH=206	35.2	not assigned.unknown	4.2	0.00516015		transport	34	6	0.0560748	9	0.0743802
MLOC_55014	MLOC_55014	34.1	transport.p- and v-ATPases	4.1	1.83748e-12		not assigned	35	63	0.588785	27	0.22314
MLOC_34109	Ion channel DMI1IPR010420 (CASTOR/POLLUX/SYM8 ion channels)	35.2	not assigned.unknown	4.1	0.00849991				107		121
MLOC_6863	Unknown protein	35.2	not assigned.unknown	4.1	0.00124893
MLOC_2769	BEST Arabidopsis thaliana protein match is: TPX2 (targeting protein for Xklp2) protein family . LENGTH=367	35.2	not assigned.unknown	4.0	0.00742432
MLOC_49593	Protein of unknown function (DUF3245) LENGTH=127IPR021641 (Protein of unknown function DUF3245)	35.2	not assigned.unknown	4.0	0.00198905
MLOC_60700	Replication protein A 70 kDa DNA-binding subunitIPR016027 (Nucleic acid-binding, OB-fold-like)	28.99	DNA.unspecified	4.0	8.98134e-05
MLOC_37492	Ribosomal RNA apurinic site specific lyase-like protein	35.1	not assigned.no ontology	3.8	1.46896e-05
MLOC_45211	TTF-type zinc finger protein with HAT dimerisation domain LENGTH=769IPR008906 (HAT dimerisation), IPR012337 (Ribonuclease H-like domain)	28.1.1.4	DNA.synthesis/chromatin structure.retrotransposon/transposase.hat-like transposase	3.7	9.07245e-08
MLOC_66229	Unknown proteinIPR011676 (Domain of unknown function DUF1618)	35.2	not assigned.unknown	3.6	0.0014047
MLOC_38261	Cyclin B1 interacting protein 1, E3 ubiquitin protein ligaseIPR013083 (Zinc finger, RING/FYVE/PHD-type)	27.3.67	RNA.regulation of transcription.putative transcription regulator	3.4	1.43484e-05
MLOC_72949	Dof zinc finger protein 13IPR003851 (Zinc finger, Dof-type)	27.3.111	RNA.regulation of transcription.FAR1 transcription factor family	3.4	0.00346405
MLOC_43355	Ribosomal RNA apurinic site specific lyase	35.2	not assigned.unknown	3.4	0.00162299
MLOC_22823	Glutathione S-transferaseIPR004045 (Glutathione S-transferase, N-terminal), IPR004046 (Glutathione S-transferase, C-terminal)	26.6	misc.O-methyl transferases	3.3	0.000122223
MLOC_62865	AIG2-like (avirulence induced gene) family protein LENGTH=187IPR009288 (AIG2-like)	35.2	not assigned.unknown	3.2	0.00620426
MLOC_26807	unknown protein Has 54 Blast hits to 54 proteins in 22 species: Archae - 0 Bacteria - 0 Metazoa - 29 Fungi - 0 Plants - 24 Viruses - 0 Other Eukaryotes - 1 (source: NCBI BLink). LENGTH=642	35.2	not assigned.unknown	3.1	9.30362e-19
MLOC_72099	ATP-dependent zinc metalloprotease FtsH 1IPR003959 (ATPase, AAA-type, core), IPR005936 (Peptidase, FtsH)	29.4.1.59	protein.postranslational modification.kinase.receptor like cytoplasmatic kinase IX	3.0	1.56936e-05
MLOC_41053	Transposon protein, putative, Mutator sub-classIPR019557 (Aminotransferase-like, plant mobile domain)	35.2	not assigned.unknown	2.9	3.12787e-05
MLOC_9315	Transposon protein, putative, Mutator sub-class, expressed	35.2	not assigned.unknown	2.7	0.00565219
MLOC_36824	Serine carboxypeptidase family protein, expressedIPR001563 (Peptidase S10, serine carboxypeptidase)	29.5.11.4.5.2	protein.degradation.ubiquitin.E3.BTB/POZ Cullin3.BTB/POZ	2.7	0.00185131
MLOC_1579	Protochlorophyllide reductase AIPR002198 (Short-chain dehydrogenase/reductase SDR)	19.14	tetrapyrrole synthesis.protochlorophyllide reductase	2.7	0.00316176
MLOC_23856	glutamine dumper 3 LENGTH=148	35.1	not assigned.no ontology	2.6	0.0015376
MLOC_68833	Protein of unknown function (DUF506) LENGTH=310IPR006502 (Protein of unknown function DUF506, plant)	35.2	not assigned.unknown	2.6	0.0065371
MLOC_29828	ATP synthase subunit-like proteinIPR004252 (Transposase, Ptta/En/Spm, plant), IPR017690 (Outer membrane insertion C-terminal signal, omp85 target)	35.2	not assigned.unknown	2.5	8.88054e-07
MLOC_18163	Ulp1 protease family, C-terminal catalytic domain containing protein, expressedIPR003653 (Peptidase C48, SUMO/Sentrin/Ubl1)	35.2	not assigned.unknown	2.5	0.000278465
MLOC_8548	Unknown protein	35.2	not assigned.unknown	2.5	1.51114e-10
MLOC_41925	Unknown protein	35.2	not assigned.unknown	2.5	1.61977e-25
MLOC_73666	Unknown proteinIPR009606 (Protein of unknown function DUF1218)	35.2	not assigned.unknown	2.5	0.00435955
MLOC_53891	Unknown protein	35.2	not assigned.unknown	2.4	1.94912e-09
MLOC_58639	Cytokinin oxidase/dehydrogenase 1IPR016164 (FAD-linked oxidase-like, C-terminal), IPR016166 (FAD-binding, type 2)	17.4.1	hormone metabolism.cytokinin.synthesis-degradation	2.4	0.00347898
MLOC_23906	MLOC_23906	27.3.3	RNA.regulation of transcription.AP2/EREBP transcription factor family	2.1	0.00137334
MLOC_14069	Unknown protein	35.2	not assigned.unknown	2.0	0.00124857
MLOC_29327	Unknown protein	35.2	not assigned.unknown	2.0	0.00256321
MLOC_56462	Gibberellin-20 oxidase-2IPR002283 (Isopenicillin N synthase)	17.6.1.11	hormone metabolism.gibberelin.synthesis-degradation.GA20 oxidase	1.9	0.000443306
MLOC_56230	Plant protein 1589 of unknown function LENGTH=91IPR006476 (Conserved hypothetical protein CHP01589, plant)	35.2	not assigned.unknown	1.9	5.07761e-06
MLOC_56741	Retrotransposon protein, putative, LINE subclass, expressedIPR005135 (Endonuclease/exonuclease/phosphatase)	35.2	not assigned.unknown	1.8	0.00208264
MLOC_80686	Leaf rust resistance protein Lr10	20.1	stress.biotic	1.8	4.46454e-05
MLOC_38658	Polyamine oxidase, putativeIPR002937 (Amine oxidase)	22.2.1	polyamine metabolism.degradation.polyamin oxidase	1.8	0.00430931
MLOC_52865	Oxidoreductase, zinc-containing alcohol dehydrogenase familyIPR002085 (Alcohol dehydrogenase superfamily, zinc-type), IPR011032 (GroES-like), IPR013149 (Alcohol dehydrogenase, C-terminal), IPR016040 (NAD(P)-binding domain)	26.7	misc.oxidases - copper, flavone etc	1.6	0.000213122
MLOC_74542	NBS-LRR disease resistance protein, putative, expressedIPR000767 (Disease resistance protein)	20.1	stress.biotic	1.6	5.35686e-09
MLOC_77116	HGWP repeat containing protein-like	35.2	not assigned.unknown	1.6	0.00387893
MLOC_57491	Retrotransposon protein, putative, unclassified	35.2	not assigned.unknown	1.4	5.11885e-07
MLOC_21519	Glucan synthase-like 7IPR003440 (Glycosyl transferase, family 48)	3.6	minor CHO metabolism.callose	1.4	0.00062951
MLOC_17138	receptor-like protein kinase-related family protein LENGTH=263IPR002902 (Gnk2-homologous domain)	35.2	not assigned.unknown	1.4	3.99529e-05
MLOC_36712	NBS-LRR resistance-like protein	35.2	not assigned.unknown	1.4	1.27819e-11
MLOC_9548	Retrotransposon protein, putative, unclassifiedIPR000477 (Reverse transcriptase)	35.2	not assigned.unknown	1.3	0.00682758
MLOC_30512	HAT family dimerisation domain containing proteinIPR007021 (Domain of unknown function DUF659), IPR012337 (Ribonuclease H-like domain)	27.3.8	RNA.regulation of transcription.C2C2 DOF transcription factor family	1.2	0.00730011
MLOC_79223	Transcription factor, putativeIPR004827 (Basic-leucine zipper domain)	27.3.11	RNA.regulation of transcription.C2H2 zinc finger transcription factor family	1.2	0.00555132
MLOC_18287	Pore-forming toxin-like protein Hfr-2IPR005830 (Aerolysin/haemolysin/leukocidin toxin), IPR008998 (Agglutinin), IPR023307 (Aerolysin-like toxin, beta complex domain)	35.2	not assigned.unknown	1.2	0.00113569
MLOC_25093	Unknown protein	35.2	not assigned.unknown	1.1	4.81571e-30
MLOC_77869	Serine carboxypeptidase, putativeIPR001563 (Peptidase S10, serine carboxypeptidase)	29.5.9	protein.degradation.AAA type	1.1	0.00720454
MLOC_11323	Transposon protein, putative, CACTA, En/Spm sub-class, expressed	35.2	not assigned.unknown	1.0	6.28958e-51
MLOC_27941	Unknown proteinIPR012474 (Frigida-like)	35.2	not assigned.unknown	1.0	1.12283e-51
MLOC_11897	Dimethylaniline monooxygenase, putativeIPR020946 (Flavin monooxygenase-like)	26.19	misc.plastocyanin-like	0.9	0.0032163
MLOC_56629	Major facilitator superfamily antiporter, putative, expressedIPR011701 (Major facilitator superfamily), IPR016196 (Major facilitator superfamily domain, general substrate transporter)	34.14	transport.unspecified cations	0.8	8.44906e-07
MLOC_75032	2-oxoglutarate (2OG) and Fe(II)-dependent oxygenase superfamily protein LENGTH=348IPR005123 (Oxoglutarate/iron-dependent oxygenase)	16.8.4	secondary metabolism.flavonoids.flavonols	0.8	0.00549566
MLOC_57202	Retrotransposon protein, putative, unclassified	35.2	not assigned.unknown	0.8	1.46896e-05
MLOC_50994	6,7-dimethyl-8-ribityllumazine synthaseIPR002180 (6,7-dimethyl-8-ribityllumazine synthase)	18.3.2	Co-factor and vitamine metabolism.riboflavin.riboflavin synthase	0.8	8.1048e-08
MLOC_61177	Gamma-tubulin complex component 5-likeIPR007259 (Spc97/Spc98)	31.1.1.2	cell.organisation.cytoskeleton.mikrotubuli	0.8	0.000101859
MLOC_10855	AquaporinIPR000425 (Major intrinsic protein), IPR023271 (Aquaporin-like)	34.19.1	transport.Major Intrinsic Proteins.PIP	0.8	0.00159849
MLOC_75972	CP12, putative, expressedIPR003823 (Domain of unknown function CP12)	1.3	PS.calvin cycle	0.7	0.00700898
MLOC_17690	BZIP transcription factorIPR004827 (Basic-leucine zipper domain)	27.3.29	RNA.regulation of transcription.TCP transcription factor family	0.7	0.00383016
MLOC_56600	Unknown protein	35.2	not assigned.unknown	0.7	0.0029695
MLOC_20525	3-oxoacyl-[acyl-carrier-protein] synthaseIPR000794 (Beta-ketoacyl synthase)	11.1.3	lipid metabolism.FA synthesis and FA elongation.ketoacyl ACP synthase	0.7	0.0057319
MLOC_20185	3-methyl-2-oxobutanoate hydroxymethyltransferaseIPR003700 (Ketopantoate hydroxymethyltransferase)	18.4.2	Co-factor and vitamine metabolism.pantothenate.3-methyl-2-oxobutanoate hydroxymethyltransferase (KPHMT,PANB)	0.7	0.00162299
MLOC_68042	Cysteine proteinaseIPR013128 (Peptidase C1A, papain)	29.5.11.4.3.2	protein.degradation.ubiquitin.E3.SCF.FBOX	0.7	1.46983e-05
MLOC_17989	Potassium transporter, putativeIPR003855 (K+ potassium transporter)	34.12	transport.metal	0.6	0.00336478
MLOC_14101	O-methyltransferaseIPR016461 (O-methyltransferase, COMT, eukaryota)	26.12	misc.peroxidases	0.6	6.05327e-06
MLOC_1504	Transposon protein, putative, CACTA, En/Spm sub-class, expressed	35.2	not assigned.unknown	0.6	3.07474e-47
MLOC_33151	Sugar transporter ERD6-like 5	35.2	not assigned.unknown	0.6	2.57868e-07
MLOC_77763	AP2-like ethylene-responsive transcription factorIPR016177 (DNA-binding, integrase-type)	27.3.22.1	RNA.regulation of transcription.HB (Homeobox) transcription factor family.HD-ZIP I/II subfamily	0.6	0.00500781
MLOC_38270	BTB/POZ domain containing proteinIPR008974 (TRAF-like), IPR011333 (BTB/POZ fold)	29.2.2.3.3	protein.synthesis.ribosome biogenesis.Pre-rRNA processing and modifications.methylotransferases	0.6	1.78212e-15
MLOC_3019	Late embryogenesis abundant (LEA) hydroxyproline-rich glycoprotein family LENGTH=213IPR004864 (Late embryogenesis abundant protein, LEA-14)	35.2	not assigned.unknown	0.6	2.35349e-12
MLOC_41138	Far-red impaired response protein-like protein	35.2	not assigned.unknown	0.6	0.000826599
MLOC_60771	Ankyrin repeat family protein-likeIPR020683 (Ankyrin repeat-containing domain)	31.1	cell.organisation	0.6	0.00985163
MLOC_20738	Phosphopantothenoylcysteine decarboxylaseIPR003382 (Flavoprotein)	18.4.7	Co-factor and vitamine metabolism.pantothenate.phosphopantothenoylcysteine decarboxylase (PPCDC)	0.5	0.00886638
MLOC_75601	Ethylene-responsive transcription factor 1IPR016177 (DNA-binding, integrase-type)	27.3.67	RNA.regulation of transcription.putative transcription regulator	0.4	0.00653513
MLOC_68464	Unknown protein	35.2	not assigned.unknown	0.4	6.04452e-07
MLOC_81998	HGWP repeat containing protein-like	35.2	not assigned.unknown	0.4	7.01187e-08
MLOC_28610	UDP-sugar pyrophosphorylase LENGTH=614	35.2	not assigned.unknown	0.4	0.00101107
MLOC_56531	Golgi SNAP receptor complex member 2	31.4	cell.vesicle transport	0.3	0.00671057
MLOC_38468	FAD dependent oxidoreductaseIPR006076 (FAD dependent oxidoreductase), IPR016040 (NAD(P)-binding domain)	16.1.4	secondary metabolism.isoprenoids.carotenoids	0.2	0.00567566
MLOC_1497	Glucose-6-phosphate isomeraseIPR001672 (Phosphoglucose isomerase (PGI))	4.2.3	glycolysis.plastid branch.glucose-6-phosphate isomerase	-0.4	0.00342683
MLOC_240	NAM-like protein	35.2	not assigned.unknown	-0.5	9.84427e-18
MLOC_16918	Sec14p-like phosphatidylinositol transfer family protein LENGTH=637IPR001071 (Cellular retinaldehyde binding/alpha-tocopherol transport), IPR011074 (CRAL/TRIO, N-terminal domain)	28.99	DNA.unspecified	-0.5	0.00925466
MLOC_34795	MLOC_34795	27.2	RNA.transcription	-0.6	0.000371016
MLOC_24563	Transposon protein, putative, CACTA, En/Spm sub-class	35.2	not assigned.unknown	-0.6	9.3024e-08
MLOC_71781	Dehydroascorbate reductaseIPR010987 (Glutathione S-transferase, C-terminal-like), IPR012336 (Thioredoxin-like fold)	21.2.1	redox.ascorbate and glutathione.ascorbate	-0.6	0.00182539
MLOC_22948	3-oxo-5-alpha-steroid 4-dehydrogenaseIPR001104 (3-oxo-5-alpha-steroid 4-dehydrogenase, C-terminal)	17.3.1.1.1	hormone metabolism.brassinosteroid.synthesis-degradation.BRs.DET2	-0.7	0.00699473
MLOC_51081	Pentatricopeptide repeat-containing proteinIPR002885 (Pentatricopeptide repeat), IPR011990 (Tetratricopeptide-like helical)	35.1.5	not assigned.no ontology.pentatricopeptide (PPR) repeat-containing protein	-0.7	0.000128921
MLOC_38035	MLOC_38035	29.4	protein.postranslational modification	-0.7	0.00699473
MLOC_26887	Transposon protein, putative, CACTA, En/Spm sub-class, expressed	35.2	not assigned.unknown	-0.7	7.16711e-28
MLOC_62114	Calmodulin-binding protein, putative, expressedIPR012416 (Calmodulin binding protein-like)	30.3	signalling.calcium	-0.7	0.00109341
MLOC_14785	TCP family transcription factor containing proteinIPR005333 (Transcription factor, TCP)	27.3.99	RNA.regulation of transcription.unclassified	-0.9	0.00849991
MLOC_58685	MLOC_58685	31.1	cell.organisation	-1.0	0.00447039
MLOC_77836	F-box family protein-likeIPR001810 (F-box domain, cyclin-like)	29.5.7	protein.degradation.metalloprotease	-1.0	0.00650769
MLOC_2407	Transposon protein, putative, CACTA, En/Spm sub-class, expressed	35.2	not assigned.unknown	-1.3	5.39904e-12
MLOC_36942	NAC domain protein,IPR003441 (No apical meristem (NAM) protein)	27.3.22.8	RNA.regulation of transcription.HB (Homeobox) transcription factor family.PHD subfamily	-1.3	0.00151318
MLOC_11359	MLOC_11359	17.3.1.1.5	hormone metabolism.brassinosteroid.synthesis-degradation.BRs.metabolic regulation	-1.3	0.00505866
MLOC_36262	MLOC_36262	35.2	not assigned.unknown	-1.4	2.01269e-10
MLOC_65665	MADS-box transcription factor 47IPR002100 (Transcription factor, MADS-box), IPR002487 (Transcription factor, K-box)	33.99	development.unspecified	-1.4	0.00841711
MLOC_71615	Protein kinase family proteinIPR011009 (Protein kinase-like domain)	29.5.5	protein.degradation.serine protease	-1.4	0.000222702
MLOC_80344	GRF zinc finger family protein	35.2	not assigned.unknown	-1.4	1.22907e-08
MLOC_37296	Ribosomal RNA-processing proteinIPR007823 (Methyltransferase-related)	29.5.5	protein.degradation.serine protease	-1.5	0.0068724
MLOC_10916	2,3-bisphosphoglycerate-independent phosphoglycerate mutase, putativeIPR005995 (Phosphoglycerate mutase, 2,3-bisphosphoglycerate-independent)	4.1.12	glycolysis.cytosolic branch.phosphoglycerate mutase	-1.5	0.00335685
MLOC_10223	Kelch-like proteinIPR011333 (BTB/POZ fold), IPR011705 (BTB/Kelch-associated)	35.1.9	not assigned.no ontology.BTB/POZ domain-containing protein	-1.5	0.000998813
MLOC_13576	Potassium channelIPR003938 (Potassium channel, voltage-dependent, EAG/ELK/ERG)	34.15	transport.potassium	-1.7	0.00114215
MLOC_61795	MLOC_61795			-1.9	2.63338e-05
MLOC_69042	MLOC_69042	29.6	protein.folding	-1.9	1.34028e-15
MLOC_56998	Beta-fructofuranosidaseIPR008985 (Concanavalin A-like lectin/glucanase), IPR013148 (Glycosyl hydrolases family 32, N-terminal), IPR023296 (Glycosyl hydrolase family 43, five-bladed beta-propellor domain)	2.2.1.3.2	major CHO metabolism.degradation.sucrose.invertases.cell wall	-2.0	0.00484913
MLOC_80629	Mutator-like transposase	35.2	not assigned.unknown	-2.1	1.99104e-15
MLOC_12024	NBS-LRR disease resistance protein homologueIPR000767 (Disease resistance protein)	20.1	stress.biotic	-2.2	0.00650769
MLOC_78131	Leucine-rich receptor-like protein kinase family protein LENGTH=1101IPR001611 (Leucine-rich repeat), IPR011009 (Protein kinase-like domain), IPR013210 (Leucine-rich repeat-containing N-terminal, type 2), IPR013320 (Concanavalin A-like lectin/glucanase, subgroup)	30.2.12	signalling.receptor kinases.leucine rich repeat XII	-2.2	0.00382138
MLOC_67894	AquaporinIPR000425 (Major intrinsic protein), IPR023271 (Aquaporin-like)	34.19.3	transport.Major Intrinsic Proteins.NIP	-2.2	0.00151318
MLOC_38010	MLOC_38010	17.6.1.2	hormone metabolism.gibberelin.synthesis-degradation.ent-kaurene synthase	-2.3	1.7812e-09
MLOC_52134	myb domain protein 93 LENGTH=365IPR009057 (Homeodomain-like), IPR015495 (Myb transcription factor)	27.3.3	RNA.regulation of transcription.AP2/EREBP transcription factor family	-2.3	0.00124893
MLOC_18441	Homeodomain transcription factorIPR009057 (Homeodomain-like), IPR013083 (Zinc finger, RING/FYVE/PHD-type)	27.3.35	RNA.regulation of transcription.bZIP transcription factor family	-2.3	0.00347898
MLOC_55770	O-methyltransferaseIPR016461 (O-methyltransferase, COMT, eukaryota)	26.13	misc.acid and other phosphatases	-2.4	3.99529e-05
MLOC_64089	4-coumarate-coa ligaseIPR000873 (AMP-dependent synthetase/ligase)	16.2.1.3	secondary metabolism.phenylpropanoids.lignin biosynthesis.4CL	-2.4	0.00479264
MLOC_60187	Protein disulfide isomeraseIPR005746 (Thioredoxin), IPR012336 (Thioredoxin-like fold)	21.1.1	redox.thioredoxin.PDIL	-2.5	0.00234742
MLOC_55207	Protein kinaseIPR002902 (Gnk2-homologous domain), IPR011009 (Protein kinase-like domain)	29.4	protein.postranslational modification	-2.5	0.00849991
MLOC_19305	O-methyltransferaseIPR016461 (O-methyltransferase, COMT, eukaryota)	26.13	misc.acid and other phosphatases	-2.7	0.00620426
MLOC_37167	MLOC_37167	4.1.13	glycolysis.cytosolic branch.enolase	-2.7	0.00949258
MLOC_4317	Receptor-like protein kinaseIPR000858 (S-locus glycoprotein), IPR001480 (Bulb-type lectin domain), IPR003609 (Apple-like), IPR011009 (Protein kinase-like domain)	29.4	protein.postranslational modification	-2.7	0.00914838
MLOC_17583	MLOC_17583	11.1.8	lipid metabolism.FA synthesis and FA elongation.acyl coa ligase	-2.9	0.00159849
MLOC_5668	Homeobox-leucine zipper-like proteinIPR003106 (Leucine zipper, homeobox-associated), IPR009057 (Homeodomain-like)	27.3.27	RNA.regulation of transcription.NAC transcription factor family	-3.0	0.00699473
MLOC_6053	GDSL esterase/lipaseIPR001087 (Lipase, GDSL), IPR013830 (Esterase, SGNH hydrolase-type)	26.10	misc.cytochrome P450	-3.0	0.00480792
MLOC_4917	Patatin T5, putativeIPR016035 (Acyl transferase/acyl hydrolase/lysophospholipase)	33.1	development.storage proteins	-3.0	0.00157353
MLOC_120	UDP-Glycosyltransferase superfamily protein LENGTH=478IPR002213 (UDP-glucuronosyl/UDP-glucosyltransferase)	26.10	misc.cytochrome P450	-3.0	0.00382752
MLOC_10849	Protein kinase, putativeIPR011009 (Protein kinase-like domain), IPR013320 (Concanavalin A-like lectin/glucanase, subgroup)	29.4	protein.postranslational modification	-3.2	0.00405464
MLOC_65674	Blue copper proteinIPR008972 (Cupredoxin)	26.12	misc.peroxidases	-3.3	0.000848598
MLOC_51295	Patatin T5IPR016035 (Acyl transferase/acyl hydrolase/lysophospholipase)	33.1	development.storage proteins	-3.3	0.00239658
MLOC_81773	Acid phosphataseIPR005519 (Acid phosphatase (Class B)), IPR023214 (HAD-like domain)	26.12	misc.peroxidases	-3.3	0.00834477
MLOC_61462	DNA-directed RNA polymeraseIPR000684 (RNA polymerase II, heptapeptide repeat, eukaryotic), IPR000722 (RNA polymerase, alpha subunit), IPR007066 (RNA polymerase Rpb1, domain 3), IPR007080 (RNA polymerase Rpb1, domain 1), IPR007081 (RNA polymerase Rpb1, domain 5), IPR007083 (RNA polymerase Rpb1, domain 4)	27.2	RNA.transcription	-3.5	0.00985781
MLOC_68187	Protein kinase family proteinIPR009030 (Growth factor, receptor), IPR011009 (Protein kinase-like domain)	30.2.25	signalling.receptor kinases.wall associated kinase	-3.5	7.76225e-05
MLOC_79984	FAR1-related sequence 5 LENGTH=788IPR004330 (FAR1 DNA binding domain), IPR018289 (MULE transposase domain)	27.3.35	RNA.regulation of transcription.bZIP transcription factor family	-3.5	0.000473328
MLOC_5395	BLE2 proteinIPR016024 (Armadillo-type fold)	26.10	misc.cytochrome P450	-3.5	3.7303e-06
MLOC_64556	C2H2-like zinc finger proteinIPR007087 (Zinc finger, C2H2)	27.3.25	RNA.regulation of transcription.MYB transcription factor family	-3.6	0.00883504
MLOC_31393	MLOC_31393	20.2.2	stress.abiotic.cold	-3.7	0.00959223
MLOC_26429	Transposon protein, putative, ping/pong/SNOOPY sub-class	35.2	not assigned.unknown	-3.7	4.21723e-74
MLOC_70399	PeroxidaseIPR010255 (Haem peroxidase)	26.7	misc.oxidases - copper, flavone etc	-3.7	1.46896e-05
MLOC_74605	PeroxidaseIPR010255 (Haem peroxidase)	26.12	misc.peroxidases	-3.7	7.85367e-05
MLOC_54756	Replication protein A 32 kDa subunitIPR014892 (Replication protein A, C-terminal), IPR016027 (Nucleic acid-binding, OB-fold-like)	35.2	not assigned.unknown	-3.8	4.7544e-19
MLOC_74879	Potassium channelIPR003938 (Potassium channel, voltage-dependent, EAG/ELK/ERG), IPR020683 (Ankyrin repeat-containing domain)	34.15	transport.potassium	-3.8	0.0058292
MLOC_63158	F-box domain containing protein	35.1.27	not assigned.no ontology.tetratricopeptide repeat (TPR)	-3.8	6.43086e-08
MLOC_10149	Kinase, putativeIPR001611 (Leucine-rich repeat), IPR011009 (Protein kinase-like domain), IPR021720 (Malectin)	30.2.8.2	signalling.receptor kinases.leucine rich repeat VIII.VIII-2	-3.9	0.00484913
MLOC_9841	Fatty acyl coA reductaseIPR004262 (Male sterility), IPR016040 (NAD(P)-binding domain)	11.9.4.13	lipid metabolism.lipid degradation.beta-oxidation.acyl CoA reductase	-3.9	0.000194637
MLOC_54892	Peroxidase 10IPR010255 (Haem peroxidase)	26.12	misc.peroxidases	-3.9	1.14138e-05
MLOC_55629	AquaporinIPR000425 (Major intrinsic protein), IPR023271 (Aquaporin-like)	34.19.2	transport.Major Intrinsic Proteins.TIP	-4.0	0.0080492
MLOC_28102	Unknown protein	35.2	not assigned.unknown	-4.0	4.23388e-41
MLOC_38055	ExpansinIPR007118 (Expansin/Lol pI), IPR014733 (Barwin-like endoglucanase)	10.7	cell wall.modification	-4.0	0.00771131
MLOC_72483	Peroxidase 2IPR010255 (Haem peroxidase)	20.2.2	stress.abiotic.cold	-4.0	0.00730011
MLOC_39332	MLOC_39332	26.28	misc.GDSL-motif lipase	-4.1	0.00185212
MLOC_15580	Potassium transporter, putativeIPR003855 (K+ potassium transporter)	34.15	transport.potassium	-4.1	0.00012019
MLOC_65908	1-aminocyclopropane-1-carboxylate synthase 2bIPR001176 (1-aminocyclopropane-1-carboxylate synthase), IPR015424 (Pyridoxal phosphate-dependent transferase, major domain)	17.5.1.1	hormone metabolism.ethylene.synthesis-degradation.1-aminocyclopropane-1-carboxylate synthase	-4.1	0.00346405
MLOC_64486	PeroxidaseIPR010255 (Haem peroxidase)	26.12	misc.peroxidases	-4.2	0.00195591
MLOC_31213	cDNA clone:J013022N21, full insert sequence	35.2	not assigned.unknown	-4.2	1.03812e-19
MLOC_72685	Similarity to late embryogenesis abundant proteinIPR009646 (Root cap)	33.2	development.late embryogenesis abundant	-4.2	0.00405464
MLOC_53680	HAT dimerisation domain-containing protein-likeIPR008906 (HAT dimerisation), IPR012337 (Ribonuclease H-like domain)	35.1	not assigned.no ontology	-4.2	1.10744e-53
MLOC_72076	Peroxidase 10IPR010255 (Haem peroxidase)	26.2	misc.UDP glucosyl and glucoronyl transferases	-4.2	0.00242766
MLOC_27807	S-adenosyl-L-methionine:carboxyl methyltransferase family proteinIPR005299 (SAM dependent carboxyl methyltransferase)	17.7.1.10	hormone metabolism.jasmonate.synthesis-degradation.jasmonate-O-methyltransferase	-4.3	0.000911802
MLOC_81844	Peroxidase 12IPR010255 (Haem peroxidase)	26.12	misc.peroxidases	-4.3	0.00547087
MLOC_62331	PeroxidaseIPR010255 (Haem peroxidase)	26.12	misc.peroxidases	-4.3	0.00880883
MLOC_7811	Sodium-dependent dicarboxylate transporterIPR001898 (Sodium/sulphate symporter)	34.4	transport.nitrate	-4.3	0.00773874
MLOC_1826	Peroxidase 52IPR010255 (Haem peroxidase)	26.12	misc.peroxidases	-4.3	0.00295304
MLOC_75646	Non-symbiotic hemoglobin 2IPR000971 (Globin, subset), IPR009050 (Globin-like)	21.3	redox.heme	-4.5	0.00041794
MLOC_60447	Germin-like protein 5aIPR001929 (Germin), IPR011051 (Cupin, RmlC-type)	15.2	metal handling.binding, chelation and storage	-4.5	0.000257957
MLOC_14829	MLOC_14829	16.2.1.2	secondary metabolism.phenylpropanoids.lignin biosynthesis.C4H	-4.5	0.0010864
MLOC_71338	MLOC_71338	20.2.2	stress.abiotic.cold	-4.5	5.99289e-05
MLOC_4361	Tyrosine aminotransferase 2IPR001176 (1-aminocyclopropane-1-carboxylate synthase), IPR021178 (Tyrosine transaminase)	13.2.6.2	amino acid metabolism.degradation.aromatic aa.tyrosine	-4.5	0.00124893
MLOC_75680	Ulp1 protease family, C-terminal catalytic domain containing protein, expressed	35.1	not assigned.no ontology	-4.5	1.80412e-20
MLOC_56594	Peroxidase 72IPR010255 (Haem peroxidase)	26.6	misc.O-methyl transferases	-4.5	0.000379779
MLOC_10425	Disease resistance protein (CC-NBS-LRR class) family LENGTH=908IPR000767 (Disease resistance protein)	20.1	stress.biotic	-4.5	0.000977581
MLOC_73507	MLOC_73507	26.12	misc.peroxidases	-4.6	0.00929875
MLOC_72461	Peroxidase 73IPR010255 (Haem peroxidase)	26.9	misc.glutathione S transferases	-4.6	0.00730011
MLOC_35134	Unknown protein	35.2	not assigned.unknown	-4.6	5.96649e-24
MLOC_70539	ankyrin repeat family protein LENGTH=616IPR020683 (Ankyrin repeat-containing domain)	31.1	cell.organisation	-4.7	0.000924772
MLOC_36591	Disease resistance proteinIPR002182 (NB-ARC)	20.1	stress.biotic	-4.7	0.000553837
MLOC_78452	Polyamine oxidase, putativeIPR001613 (Flavin amine oxidase)	22.2.1	polyamine metabolism.degradation.polyamin oxidase	-4.7	0.000726611
MLOC_497	Transposon protein, putative, CACTA, En/Spm sub-class	35.2	not assigned.unknown	-4.7	4.37705e-82
MLOC_12459	metacaspase 1 LENGTH=367IPR011600 (Peptidase C14, caspase catalytic)	29.5	protein.degradation	-4.7	0.000673182
MLOC_55574	Protein kinase family proteinIPR000742 (Epidermal growth factor-like domain), IPR011009 (Protein kinase-like domain)	30.2.25	signalling.receptor kinases.wall associated kinase	-4.8	0.000568556
MLOC_66094	AquaporinIPR000425 (Major intrinsic protein), IPR023271 (Aquaporin-like)	34.19.2	transport.Major Intrinsic Proteins.TIP	-4.8	0.000101859
MLOC_54294	Cytochrome P450 family protein, expressedIPR001128 (Cytochrome P450)	26.12	misc.peroxidases	-4.9	0.00287012
MLOC_71584	Peroxidase 2IPR010255 (Haem peroxidase)	20.2.2	stress.abiotic.cold	-4.9	4.03185e-05
MLOC_34709	1-aminocyclopropane-1-carboxylate oxidaseIPR005123 (Oxoglutarate/iron-dependent oxygenase)	17.5.1.2	hormone metabolism.ethylene.synthesis-degradation.1-aminocyclopropane-1-carboxylate oxidase	-4.9	0.000218594
MLOC_69825	D-arabinono-1,4-lactone oxidase family protein LENGTH=591IPR007173 (D-arabinono-1,4-lactone oxidase), IPR010030 (Plant-specific FAD-dependent oxidoreductase), IPR016164 (FAD-linked oxidase-like, C-terminal), IPR016166 (FAD-binding, type 2)	35.1	not assigned.no ontology	-5.0	0.000218766
MLOC_57100	O-methyltransferase 5IPR016461 (O-methyltransferase, COMT, eukaryota)	16.2.1.9	secondary metabolism.phenylpropanoids.lignin biosynthesis.COMT	-5.0	0.000107462
MLOC_76936	5'-methylthioadenosine/S-adenosylhomocysteine nucleosidaseIPR018017 (Nucleoside phosphorylase)	35.2	not assigned.unknown	-5.1	2.29201e-05
MLOC_68758	Hypersensitive-induced response protein, putative, expressedIPR001107 (Band 7 protein)	35.2	not assigned.unknown	-5.2	0.0050917
MLOC_12283	PLANT CADMIUM RESISTANCE 2 LENGTH=152IPR006461 (Uncharacterised protein family Cys-rich)	35.2	not assigned.unknown	-5.3	0.00570093
MLOC_55008	Cytochrome P450IPR001128 (Cytochrome P450)	26.12	misc.peroxidases	-5.4	0.00542247
MLOC_70898	Zinc transporter 4IPR003689 (Zinc/iron permease)	34.7	transport.phosphate	-5.5	0.00824217
MLOC_35341	Transposon protein, putative, Pong sub-classIPR006912 (Putative harbinger transposase-derived nuclease)	29.5.3	protein.degradation.cysteine protease	-5.6	5.60962e-07
MLOC_74463	Germin AIPR001929 (Germin), IPR011051 (Cupin, RmlC-type)	20.2.99	stress.abiotic.unspecified	-5.6	1.00362e-05
MLOC_78101	Nicotianamine synthase 1, putative, expressedIPR004298 (Nicotianamine synthase)	15.2	metal handling.binding, chelation and storage	-5.6	2.66276e-09
MLOC_44235	Cytochrome P450IPR001128 (Cytochrome P450)	26.6	misc.O-methyl transferases	-5.7	0.00700898
MLOC_11583	BURP domain-containing protein 11IPR004873 (BURP domain)	20.2.3	stress.abiotic.drought/salt	-5.8	1.39113e-06
MLOC_52920	H-ATPaseIPR004014 (ATPase, P-type cation-transporter, N-terminal), IPR005834 (Haloacid dehalogenase-like hydrolase), IPR008250 (ATPase, P-type, ATPase-associated domain)	34.16	transport.ABC transporters and multidrug resistance systems	-6.1	4.36704e-06
MLOC_56153	Nicotianamine synthase 1, putative, expressedIPR004298 (Nicotianamine synthase)	15.2	metal handling.binding, chelation and storage	-6.1	7.49634e-07
MLOC_61102	Peroxidase 1IPR010255 (Haem peroxidase)	20.2.2	stress.abiotic.cold	-6.3	2.37804e-10
MLOC_24777	Zinc finger MYM-type protein	35.2	not assigned.unknown	-6.4	5.25081e-07
MLOC_63821	Chlorophyll a-b binding protein C, chloroplasticIPR022796 (Chlorophyll A-B binding protein), IPR023329 (Chlorophyll a/b binding protein domain)	1.1.1.1	PS.lightreaction.photosystem II.LHC-II	-6.8	2.77299e-55

## Sheet: commun_DEGs
List of commun genes which were differentially expressed in the spike of both silenced CKX1 lines (compared to wild-type/WT) at stage 59.
Positive values reflect genes which were up-regulated in the transgenic line compared to the WT whereas negative values reflect genes which were down-regulated in the transgenic line compared to the WT.
Functional annotation was obtained from Mercator/Mapman
The expression of genes marked in yellow color was validated by qRT-PCR
				SC1-17.10		SC1-5.8
MLOC_ID	Description	BIN_number	BIN_description	log2FoldChange	padj	log2FoldChange	padj
MLOC_54756	Replication protein A 32 kDa subunitIPR014892 (Replication protein A, C-terminal), IPR016027 (Nucleic acid-binding, OB-fold-like)	35.2	not assigned.unknown	6.9	3.72e-21	6.5	4.7544e-19
MLOC_26429	Transposon protein, putative, ping/pong/SNOOPY sub-class	35.2	not assigned.unknown	6.6	6.17e-83	6.2	4.21723e-74
MLOC_53680	HAT dimerisation domain-containing protein-likeIPR008906 (HAT dimerisation), IPR012337 (Ribonuclease H-like domain)	35.2	not assigned.unknown	5.9	3.96e-37	7.1	1.10744e-53
MLOC_36262	MLOC_36262	35.2	not assigned.unknown	5.4	3.66e-10	5.4	2.01269e-10
MLOC_60700	Replication protein A 70 kDa DNA-binding subunitIPR016027 (Nucleic acid-binding, OB-fold-like)	28.99	DNA.unspecified	4.7	1.31e-06	4.0	8.98134e-05
MLOC_57202	Retrotransposon protein, putative, unclassified	35.2	not assigned.unknown	3.9	5.92e-05	4.0	1.46896e-05
MLOC_55014	MLOC_55014	34.2	transport.sugars	3.8	0.000900227	6.2	1.83748e-12
MLOC_9548	Retrotransposon protein, putative, unclassifiedIPR000477 (Reverse transcriptase)	35.2	not assigned.unknown	3.5	0.00227345	3.1	0.00682758
MLOC_52920	H-ATPaseIPR004014 (ATPase, P-type cation-transporter, N-terminal), IPR005834 (Haloacid dehalogenase-like hydrolase), IPR008250 (ATPase, P-type, ATPase-associated domain)	34.1	transport.p- and v-ATPases	3.0	0.00686787	4.1	4.36704e-06
MLOC_56741	Retrotransposon protein, putative, LINE subclass, expressedIPR005135 (Endonuclease/exonuclease/phosphatase)	35.2	not assigned.unknown	2.8	0.000382432	2.5	0.00208264
MLOC_33151	Sugar transporter ERD6-like 5	35.2	not assigned.unknown	2.8	0.00854271	4.1	2.57868e-07
MLOC_15580	Potassium transporter, putativeIPR003855 (K+ potassium transporter)	34.15	transport.potassium	2.6	0.00371642	5.1	0.00012019
MLOC_17138	receptor-like protein kinase-related family protein LENGTH=263IPR002902 (Gnk2-homologous domain)	35.2	not assigned.unknown	2.6	0.00021499	2.7	3.99529e-05
MLOC_57491	Retrotransposon protein, putative, unclassified	35.2	not assigned.unknown	2.6	6.87e-07	2.6	5.11885e-07
MLOC_240	NAM-like protein	35.2	not assigned.unknown	2.5	0.00100057	4.7	9.84427e-18
MLOC_58639	Cytokinin oxidase/dehydrogenase 1IPR016164 (FAD-linked oxidase-like, C-terminal), IPR016166 (FAD-binding, type 2)	17.4.1	hormone metabolism.cytokinin.synthesis-degradation	2.4	0.00391472	2.4	0.00347898
MLOC_36712	NBS-LRR resistance-like protein	35.2	not assigned.unknown	2.3	7.17e-07	2.9	1.27819e-11
MLOC_56230	Plant protein 1589 of unknown function LENGTH=91IPR006476 (Conserved hypothetical protein CHP01589, plant)	35.2	not assigned.unknown	2.2	0.000142716	2.5	5.07761e-06
MLOC_53891	Unknown protein	35.2	not assigned.unknown	2.2	4.87e-07	2.4	1.94912e-09
MLOC_73666	Unknown proteinIPR009606 (Protein of unknown function DUF1218)	35.2	not assigned.unknown	2.0	0.00686787	2.0	0.00435955
MLOC_65390	PectinesteraseIPR006501 (Pectinesterase inhibitor), IPR011050 (Pectin lyase fold/virulence factor)	10.8.1	cell wall.pectin*esterases.PME	1.8	0.00679922	8.6	0.000164621
MLOC_80686	Leaf rust resistance protein Lr10	20.1	stress.biotic	1.8	8.79e-05	1.8	4.46454e-05
MLOC_25093	Unknown protein	35.2	not assigned.unknown	1.7	2.98e-06	3.6	4.81571e-30
MLOC_26807	unknown protein Has 54 Blast hits to 54 proteins in 22 species: Archae - 0 Bacteria - 0 Metazoa - 29 Fungi - 0 Plants - 24 Viruses - 0 Other Eukaryotes - 1 (source: NCBI BLink). LENGTH=642	35.2	not assigned.unknown	1.4	2.62e-28	1.2	9.30362e-19
MLOC_14785	TCP family transcription factor containing proteinIPR005333 (Transcription factor, TCP)	27.3.29	RNA.regulation of transcription.TCP transcription factor family	0.8	0.000745409	0.7	0.00849991
MLOC_65674	Blue copper proteinIPR008972 (Cupredoxin)	26.19	misc.plastocyanin-like	0.8	0.00259369	0.9	0.000848598
MLOC_66229	Unknown proteinIPR011676 (Domain of unknown function DUF1618)	35.2	not assigned.unknown	-1.1	0.000959048	1.0	0.0014047
MLOC_71550	Protein of unknown function, DUF538 LENGTH=143IPR007493 (Protein of unknown function DUF538)	35.2	not assigned.unknown	-1.1	1.59e-09	-0.7	0.000730167
MLOC_78131	Leucine-rich receptor-like protein kinase family protein LENGTH=1101IPR001611 (Leucine-rich repeat), IPR011009 (Protein kinase-like domain), IPR013210 (Leucine-rich repeat-containing N-terminal, type 2), IPR013320 (Concanavalin A-like lectin/glucanase, subgroup)	30.2.12	signalling.receptor kinases.leucine rich repeat XII	-2.2	0.00469188	-2.2	0.00382138
MLOC_17690	BZIP transcription factorIPR004827 (Basic-leucine zipper domain)	27.3.35	RNA.regulation of transcription.bZIP transcription factor family	-2.8	0.000197526	-2.3	0.00383016
MLOC_64089	4-coumarate-coa ligaseIPR000873 (AMP-dependent synthetase/ligase)	16.2.1.3	secondary metabolism.phenylpropanoids.lignin biosynthesis.4CL	-2.9	0.00100057	-2.4	0.00479264
MLOC_60187	Protein disulfide isomeraseIPR005746 (Thioredoxin), IPR012336 (Thioredoxin-like fold)	21.1.1	redox.thioredoxin.PDIL	-2.9	0.000982136	-2.5	0.00234742
MLOC_10849	Protein kinase, putativeIPR011009 (Protein kinase-like domain), IPR013320 (Concanavalin A-like lectin/glucanase, subgroup)	29.4	protein.postranslational modification	-3.3	0.00278369	-3.2	0.00405464
MLOC_76264	Unknown protein	35.2	not assigned.unknown	-3.5	0.00119337	-5.2	6.43086e-08
MLOC_73507	MLOC_73507	26.12	misc.peroxidases	-3.8	0.00230028	-3.3	0.00929875
MLOC_34127	Tyrosine-rich hydroxyproline-rich glycoproteinIPR006041 (Pollen Ole e 1 allergen/extensin)	35.2	not assigned.unknown	-3.8	0.00239429	-3.7	0.00270541
MLOC_79223	Transcription factor, putativeIPR004827 (Basic-leucine zipper domain)	27.3.35	RNA.regulation of transcription.bZIP transcription factor family	-3.8	0.00259369	-3.5	0.00555132
MLOC_1826	Peroxidase 52IPR010255 (Haem peroxidase)	26.12	misc.peroxidases	-3.9	0.00251284	-3.7	0.00295304
MLOC_71338	MLOC_71338	20.2.2	stress.abiotic.cold	-3.9	0.00111978	-4.5	5.99289e-05
MLOC_39332	MLOC_39332	26.12	misc.peroxidases	-4.0	0.00942501	-4.3	0.00185212
MLOC_60447	Germin-like protein 5aIPR001929 (Germin), IPR011051 (Cupin, RmlC-type)	15.2	metal handling.binding, chelation and storage	-4.0	0.00278369	-4.5	0.000257957
MLOC_52865	Oxidoreductase, zinc-containing alcohol dehydrogenase familyIPR002085 (Alcohol dehydrogenase superfamily, zinc-type), IPR011032 (GroES-like), IPR013149 (Alcohol dehydrogenase, C-terminal), IPR016040 (NAD(P)-binding domain)	26.7	misc.oxidases - copper, flavone etc	-4.0	7.55e-05	-3.7	0.000213122
MLOC_55629	AquaporinIPR000425 (Major intrinsic protein), IPR023271 (Aquaporin-like)	34.19.2	transport.Major Intrinsic Proteins.TIP	-4.1	0.00687735	-4.0	0.0080492
MLOC_17989	Potassium transporter, putativeIPR003855 (K+ potassium transporter)	34.15	transport.potassium	-4.1	0.0048386	-4.1	0.00336478
MLOC_31393	MLOC_31393	20.2.2	stress.abiotic.cold	-4.1	0.00356934	-3.7	0.00959223
MLOC_72685	Similarity to late embryogenesis abundant proteinIPR009646 (Root cap)	33.2	development.late embryogenesis abundant	-4.1	0.00686787	-4.2	0.00405464
MLOC_64486	PeroxidaseIPR010255 (Haem peroxidase)	26.12	misc.peroxidases	-4.2	0.00349478	-4.3	0.00195591
MLOC_51295	Patatin T5IPR016035 (Acyl transferase/acyl hydrolase/lysophospholipase)	33.1	development.storage proteins	-4.2	2.93e-05	-3.3	0.00239658
MLOC_69825	D-arabinono-1,4-lactone oxidase family protein LENGTH=591IPR007173 (D-arabinono-1,4-lactone oxidase), IPR010030 (Plant-specific FAD-dependent oxidoreductase), IPR016164 (FAD-linked oxidase-like, C-terminal), IPR016166 (FAD-binding, type 2)	35.1	not assigned.no ontology	-4.3	0.00535747	-5.0	0.000218766
MLOC_74605	PeroxidaseIPR010255 (Haem peroxidase)	26.12	misc.peroxidases	-4.3	0.00119337	-4.9	7.85367e-05
MLOC_77155	MLOC_77155	35.2	not assigned.unknown	-4.3	0.00036002	-4.2	0.000382707
MLOC_22823	Glutathione S-transferaseIPR004045 (Glutathione S-transferase, N-terminal), IPR004046 (Glutathione S-transferase, C-terminal)	26.9	misc.glutathione S transferases	-4.3	0.00061307	-4.6	0.000122223
MLOC_36591	Disease resistance proteinIPR002182 (NB-ARC)	20.1	stress.biotic	-4.4	0.00266958	-4.7	0.000553837
MLOC_72076	Peroxidase 10IPR010255 (Haem peroxidase)	26.12	misc.peroxidases	-4.4	0.00230028	-4.3	0.00242766
MLOC_68758	Hypersensitive-induced response protein, putative, expressedIPR001107 (Band 7 protein)	35.1	not assigned.no ontology	-4.4	0.00310385	-4.2	0.0050917
MLOC_43678	Unknown protein	35.2	not assigned.unknown	-4.4	0.00116648	-3.8	0.00834477
MLOC_10425	Disease resistance protein (CC-NBS-LRR class) family LENGTH=908IPR000767 (Disease resistance protein)	20.1	stress.biotic	-4.5	0.00183089	-4.5	0.000977581
MLOC_78452	Polyamine oxidase, putativeIPR001613 (Flavin amine oxidase)	22.2.1	polyamine metabolism.degradation.polyamin oxidase	-4.5	0.00254191	-4.7	0.000726611
MLOC_12459	metacaspase 1 LENGTH=367IPR011600 (Peptidase C14, caspase catalytic)	29.5	protein.degradation	-4.5	0.00259505	-4.7	0.000673182
MLOC_75956	Metallothionein-like proteinIPR000347 (Metallothionein, family 15, plant)	35.2	not assigned.unknown	-4.5	0.00152495	-4.7	0.00041794
MLOC_62331	PeroxidaseIPR010255 (Haem peroxidase)	26.12	misc.peroxidases	-4.5	0.00168052	-3.9	0.00880883
MLOC_76936	5'-methylthioadenosine/S-adenosylhomocysteine nucleosidaseIPR018017 (Nucleoside phosphorylase)	35.1	not assigned.no ontology	-4.5	2.96e-05	-4.5	2.29201e-05
MLOC_40798	MLOC_40798	35.2	not assigned.unknown	-4.5	0.000399515	-4.6	0.000169454
MLOC_4361	Tyrosine aminotransferase 2IPR001176 (1-aminocyclopropane-1-carboxylate synthase), IPR021178 (Tyrosine transaminase)	13.2.6.2	amino acid metabolism.degradation.aromatic aa.tyrosine	-4.5	0.00142252	-4.5	0.00124893
MLOC_58438	Nitrate transporter, putativeIPR011701 (Major facilitator superfamily), IPR016196 (Major facilitator superfamily domain, general substrate transporter)	34.4	transport.nitrate	-4.6	0.00148494	-4.3	0.00376901
MLOC_55574	Protein kinase family proteinIPR000742 (Epidermal growth factor-like domain), IPR011009 (Protein kinase-like domain)	30.2.25	signalling.receptor kinases.wall associated kinase	-4.7	0.000900227	-4.8	0.000568556
MLOC_70539	ankyrin repeat family protein LENGTH=616IPR020683 (Ankyrin repeat-containing domain)	31.1	cell.organisation	-4.7	0.000940447	-4.7	0.000924772
MLOC_78101	Nicotianamine synthase 1, putative, expressedIPR004298 (Nicotianamine synthase)	15.2	metal handling.binding, chelation and storage	-4.9	7.23e-07	-5.6	2.66276e-09
MLOC_71162	Unknown protein	35.2	not assigned.unknown	-5.0	2.16e-05	-5.1	9.53532e-06
MLOC_34709	1-aminocyclopropane-1-carboxylate oxidaseIPR005123 (Oxoglutarate/iron-dependent oxygenase)	17.5.1.2	hormone metabolism.ethylene.synthesis-degradation.1-aminocyclopropane-1-carboxylate oxidase	-5.0	0.000212426	-4.9	0.000218594
MLOC_54892	Peroxidase 10IPR010255 (Haem peroxidase)	26.12	misc.peroxidases	-5.1	6.87e-07	-4.6	1.14138e-05
MLOC_55770	O-methyltransferaseIPR016461 (O-methyltransferase, COMT, eukaryota)	26.6	misc.O-methyl transferases	-5.3	7.67e-07	-4.5	3.99529e-05
MLOC_66094	AquaporinIPR000425 (Major intrinsic protein), IPR023271 (Aquaporin-like)	34.19.2	transport.Major Intrinsic Proteins.TIP	-5.3	1.21e-05	-4.8	0.000101859
MLOC_56629	Major facilitator superfamily antiporter, putative, expressedIPR011701 (Major facilitator superfamily), IPR016196 (Major facilitator superfamily domain, general substrate transporter)	34.16	transport.ABC transporters and multidrug resistance systems	-5.3	5.08e-05	-6.1	8.44906e-07
MLOC_68042	Cysteine proteinaseIPR013128 (Peptidase C1A, papain)	29.5.3	protein.degradation.cysteine protease	-5.6	2.35e-05	-5.6	1.46983e-05
MLOC_74463	Germin AIPR001929 (Germin), IPR011051 (Cupin, RmlC-type)	20.2.99	stress.abiotic.unspecified	-5.6	1.78e-05	-5.6	1.00362e-05
MLOC_57100	O-methyltransferase 5IPR016461 (O-methyltransferase, COMT, eukaryota)	16.2.1.9	secondary metabolism.phenylpropanoids.lignin biosynthesis.COMT	-5.6	8.81e-06	-5.0	0.000107462
MLOC_71584	Peroxidase 2IPR010255 (Haem peroxidase)	20.2.2	stress.abiotic.cold	-5.6	1.36e-06	-4.9	4.03185e-05
MLOC_11583	BURP domain-containing protein 11IPR004873 (BURP domain)	20.2.3	stress.abiotic.drought/salt	-5.8	2.7e-06	-5.8	1.39113e-06
MLOC_70399	PeroxidaseIPR010255 (Haem peroxidase)	26.12	misc.peroxidases	-5.9	1.67e-06	-5.4	1.46896e-05
MLOC_28370	MLOC_28370	34.7	transport.phosphate	-6.0	1.97e-06	-5.5	1.51277e-05
MLOC_14101	O-methyltransferaseIPR016461 (O-methyltransferase, COMT, eukaryota)	26.6	misc.O-methyl transferases	-6.1	1.43e-06	-5.7	6.05327e-06
MLOC_56153	Nicotianamine synthase 1, putative, expressedIPR004298 (Nicotianamine synthase)	15.2	metal handling.binding, chelation and storage	-6.2	7.7e-07	-6.1	7.49634e-07
MLOC_67879	MLOC_67879	35.2	not assigned.unknown	-6.2	4.34e-07	-6.4	6.02747e-08
MLOC_61102	Peroxidase 1IPR010255 (Haem peroxidase)	20.2.2	stress.abiotic.cold	-6.2	1.08e-09	-6.3	2.37804e-10
